# Supplementary material
Source: PubMed Central journal article supplement (PMC6459115)
Supplement: jama-321-1391-s001.pdf [file jama-321-1391-s001.pdf]

## Supplementary Online Content

Singhal G, Miller PG, Agarwala V, et al. Association of patient characteristics and tumor genomics with clinical outcomes among patients with non–small cell lung cancer using a clinicogenomic database. *JAMA*. doi:10.1001/jama.2019.3241

**eFigure 1.** Generation of the Clinico-Genomic Database (CGDB)

**eFigure 2.** Genomic Characteristics of Patients in NSCLC Cohort

**eFigure 3.** Analysis of Tumor Mutation Burden (TMB) in NSCLC Cohort

**eFigure 4.** Genomic and Clinical Features in NSCLC Dataset

**eFigure 5.** Clinical Predictors of Overall Survival in NSCLC

**eFigure 6.** Genomic Predictors of Survival and Therapy Response

**eFigure 7.** Genomic Predictors of Survival and Therapy Response

**eFigure 8.** Tumor Mutation Burden (TMB) in Immunotherapy Treated Cohort

**eFigure 9.** Immunotherapy and Tumor Mutational Burden (TMB)

**eTable 1.** Composition of Patients Sequenced on the Different Versions of the FoundationOne Sequencing Platforms

**eTable 2.** Individual Characteristics of 4064 Non-Advanced and Advanced NSCLC With Wild Type or Altered Variants of a Gene Are Compared

**eTable 3.** Real-World Maximal Response to Therapy (rwMTR) for Patients Treated With an EGFR Inhibitor Stratified by the Presence of a Mutation

**eTable 4.** Cox Multivariable Analysis for Risk of Discontinuing CIT

This supplementary material has been provided by the authors to give readers additional information about their work.

**eFigure 1. Generation of the Clinico-Genomic Database (CGDB)**

**A**

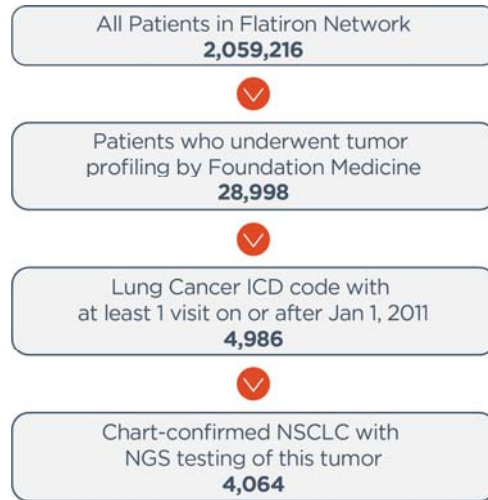

**B**

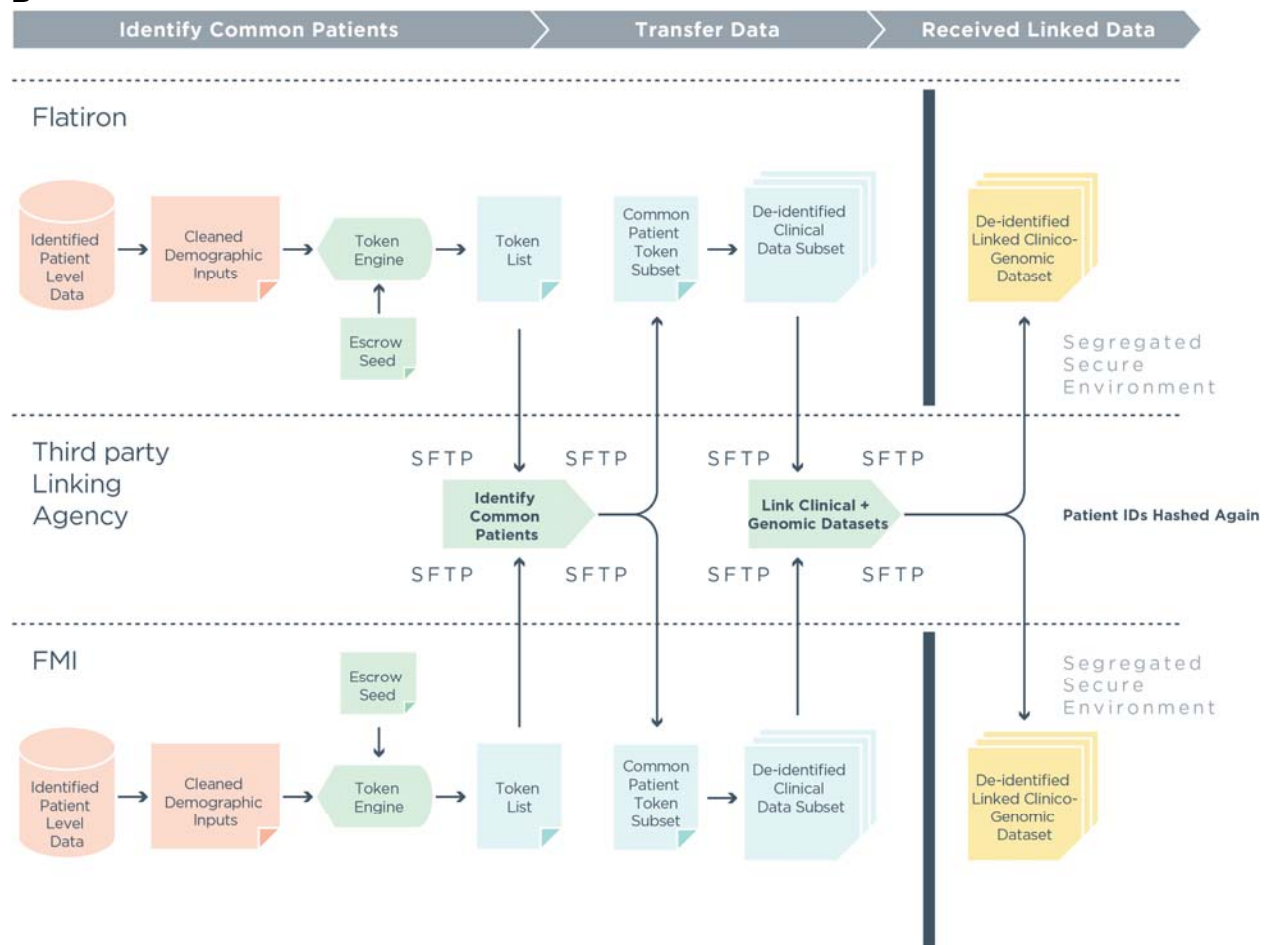

C

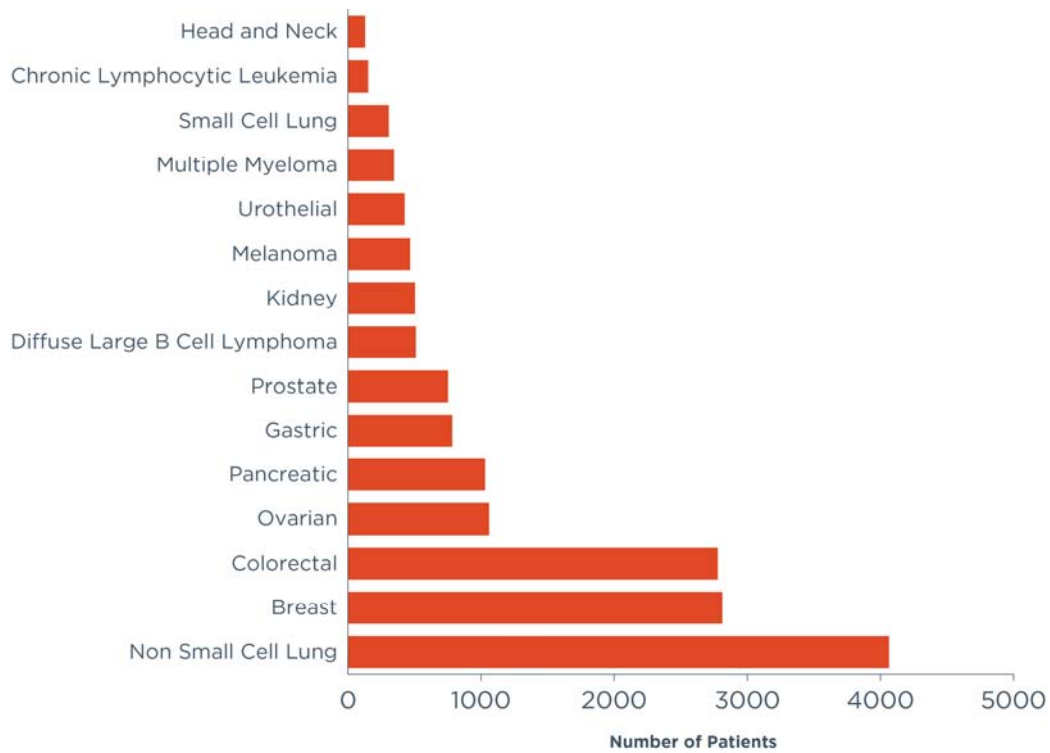

D

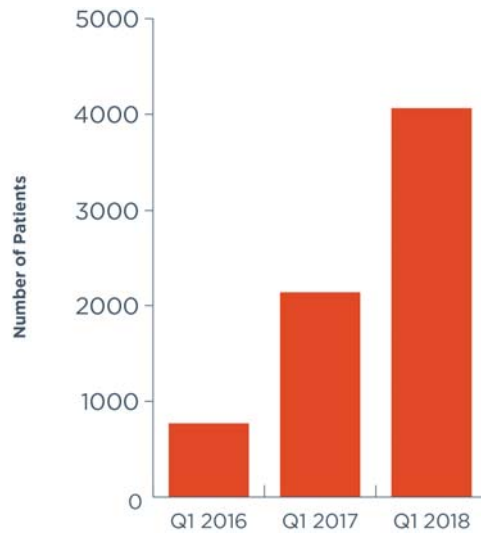

**eFigure 1: Generation of the Clinico-Genomic Database (CGDB)**

- (a) Generation of overall CGDB and Non-Small Cell Lung Cancer (NSCLC) cohort
- (b) Health Insurance Portability and Accountability Act (HIPAA)-compliant workflow for linking patient-level clinical and genomic information
- (c) Estimated composition of the CGDB by tumor subtype, as of January 1, 2018
- (d) Estimated quarterly growth of the NSCLC cohort within the CGDB over time

**eFigure 2.** Genomic Characteristics of Patients in NSCLC Cohort

A

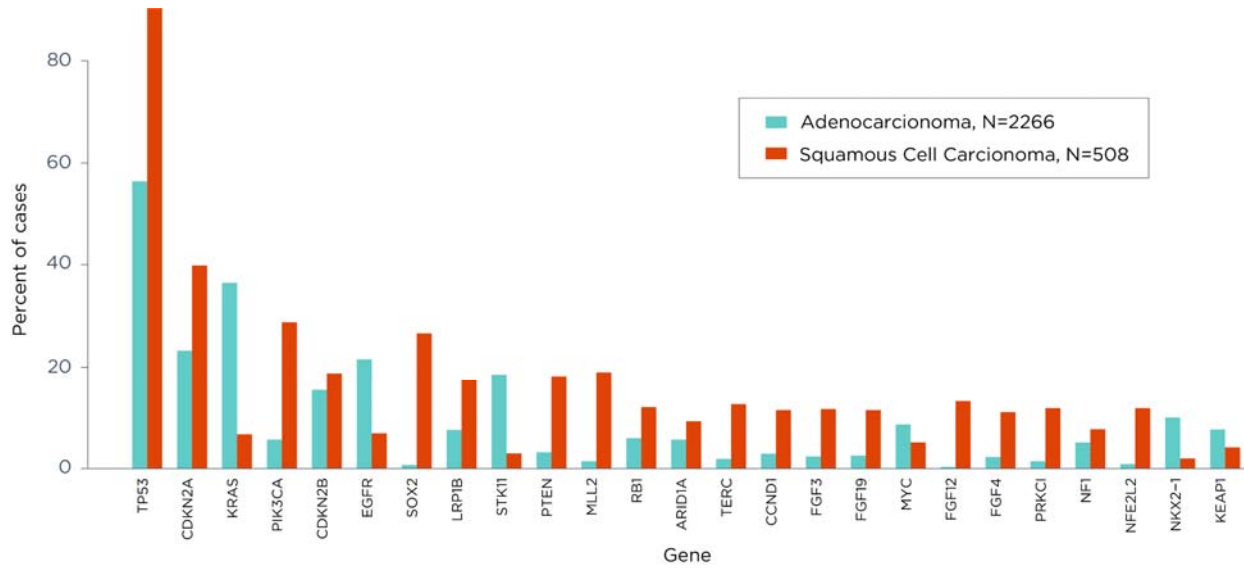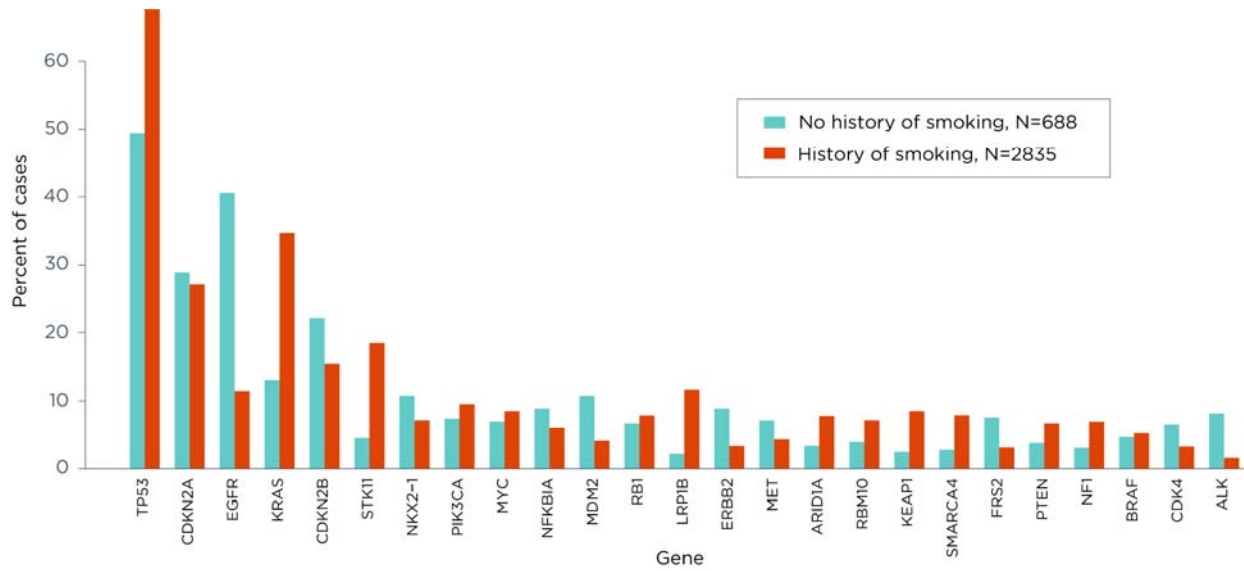

B

| DRIVER             | FUSION PARTNER | FREQUENCY |
|--------------------|----------------|-----------|
| <b><i>ALK</i></b>  | EML4           | 90        |
|                    | STRN           | 2         |
|                    | DCTN1          | 2         |
|                    | OTHER          | 23        |
| <b><i>ROS1</i></b> | CD74           | 12        |
|                    | EZR            | 5         |
|                    | TPM3           | 3         |
|                    | SDC4           | 2         |
|                    | OTHER          | 10        |
| <b><i>RET</i></b>  | KIF5B          | 27        |
|                    | CDC6           | 10        |
|                    | NCOA4          | 2         |
|                    | OTHER          | 6         |

**eFigure 2: Genomic Characteristics of Patients in NSCLC Cohort**

- (a) Distribution of mutations stratified by pathology (top) and smoking status (bottom)\*
- (b) Translocation partners of *ALK*, *ROS1*, and *RET* in NSCLC cohort

\*For purposes of uniformity, only data from patients for whom tumor sequencing was done on the most updated FoundationOne platform (see eTable 1) are presented here.

**eFigure 3.** Analysis of Tumor Mutation Burden (TMB) in NSCLC Cohort

**A**

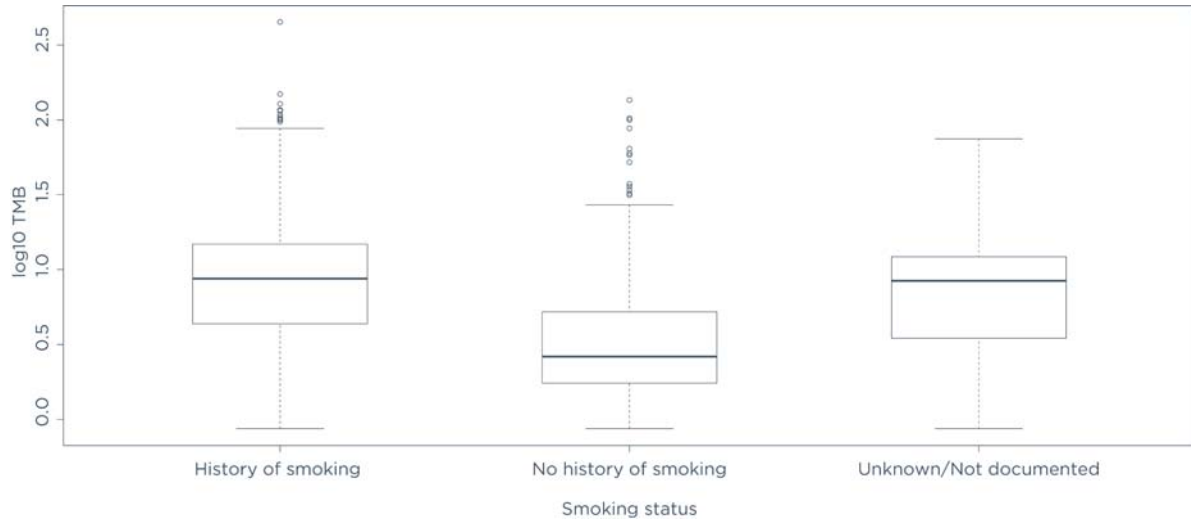

**B**

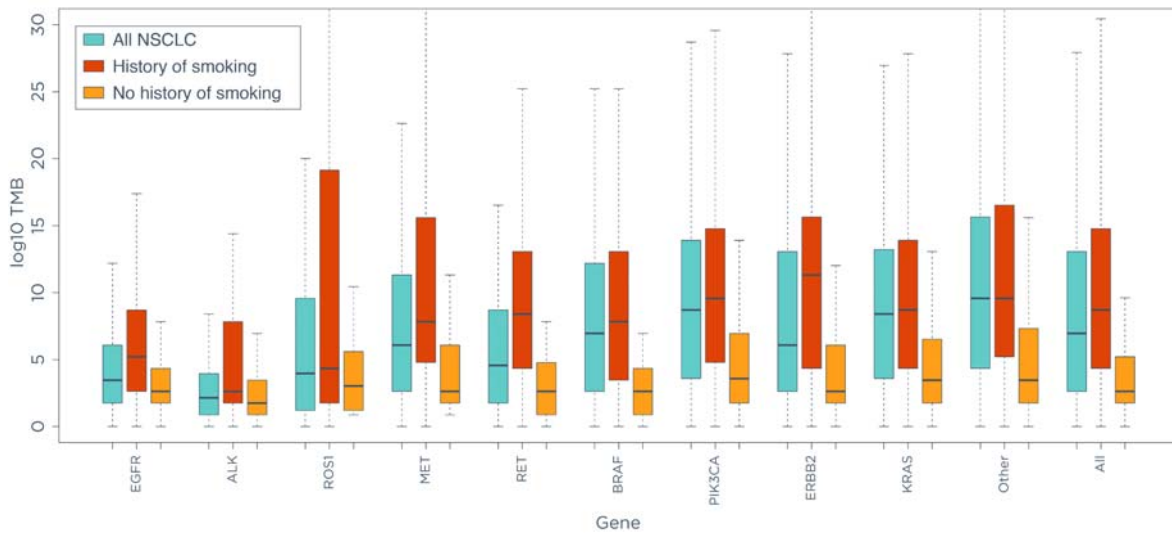

C – ALK

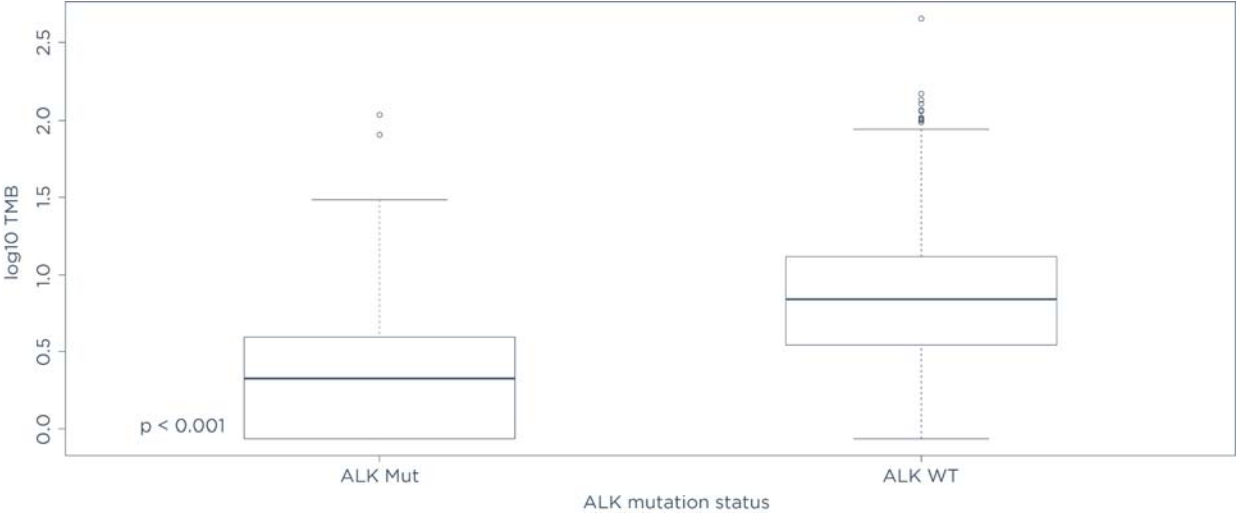

C – BRAF

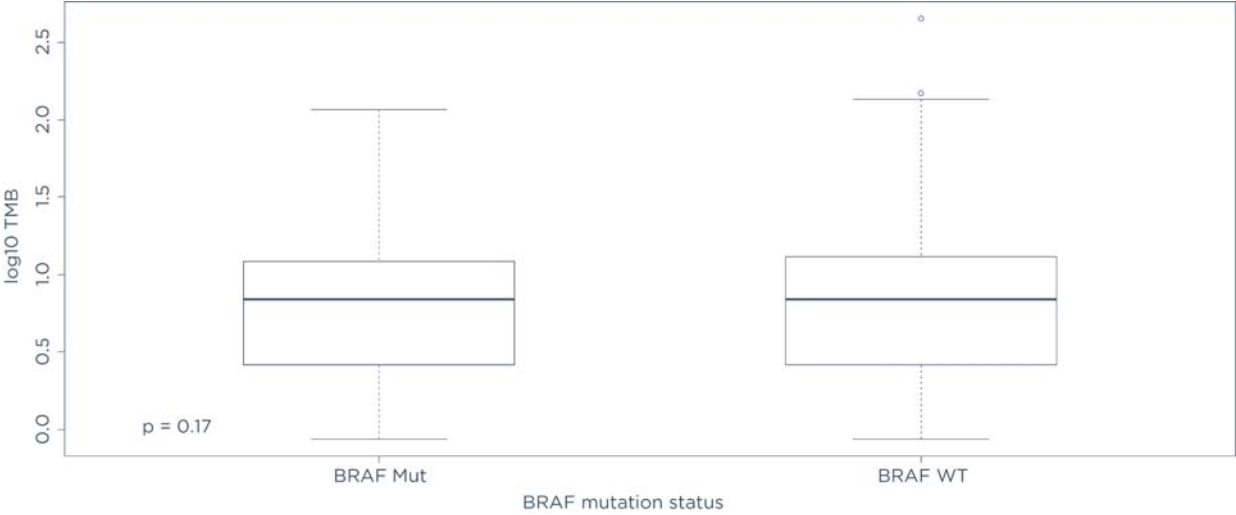

C – EGFR

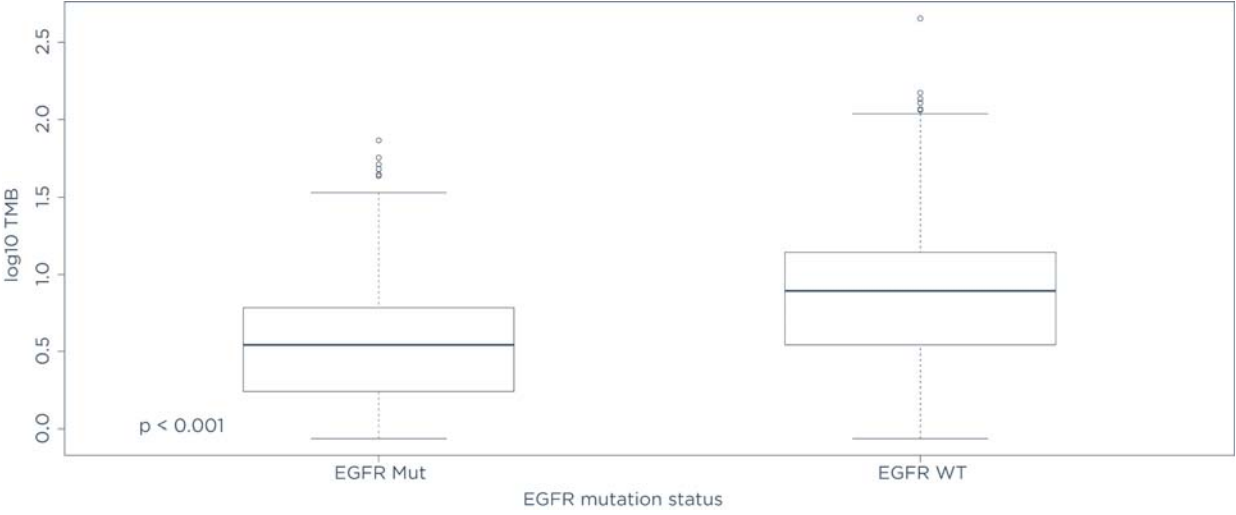

C – ERBB2

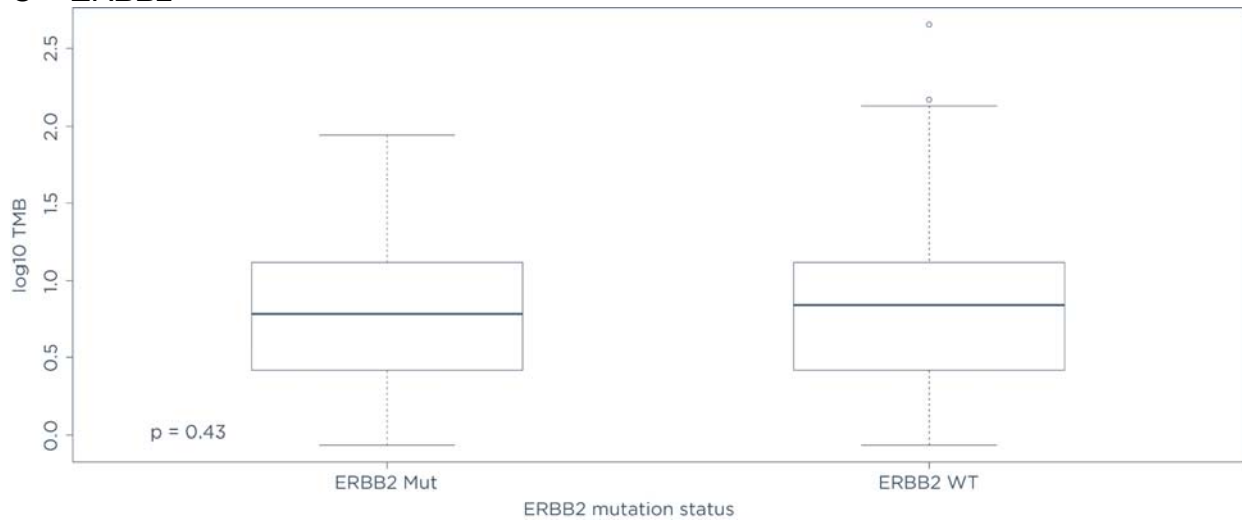

C – KRAS

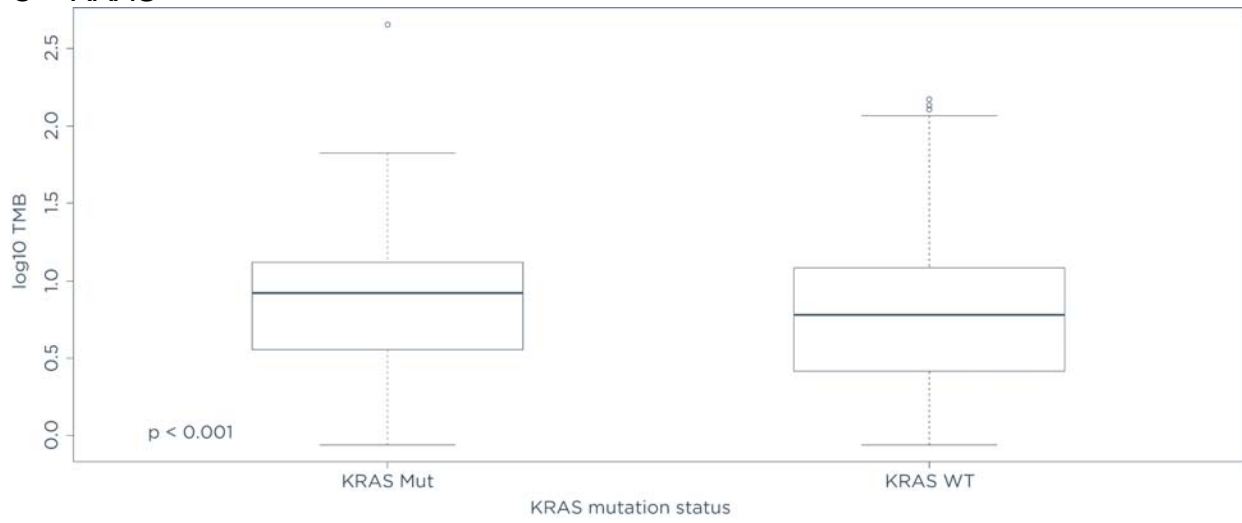

C – MET

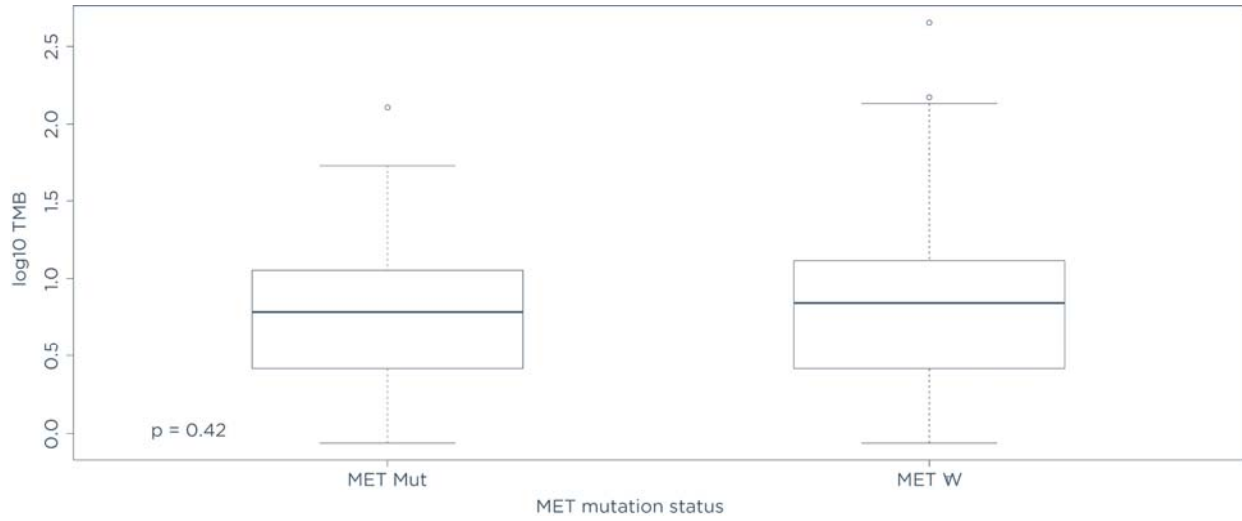



C – PIK3CA

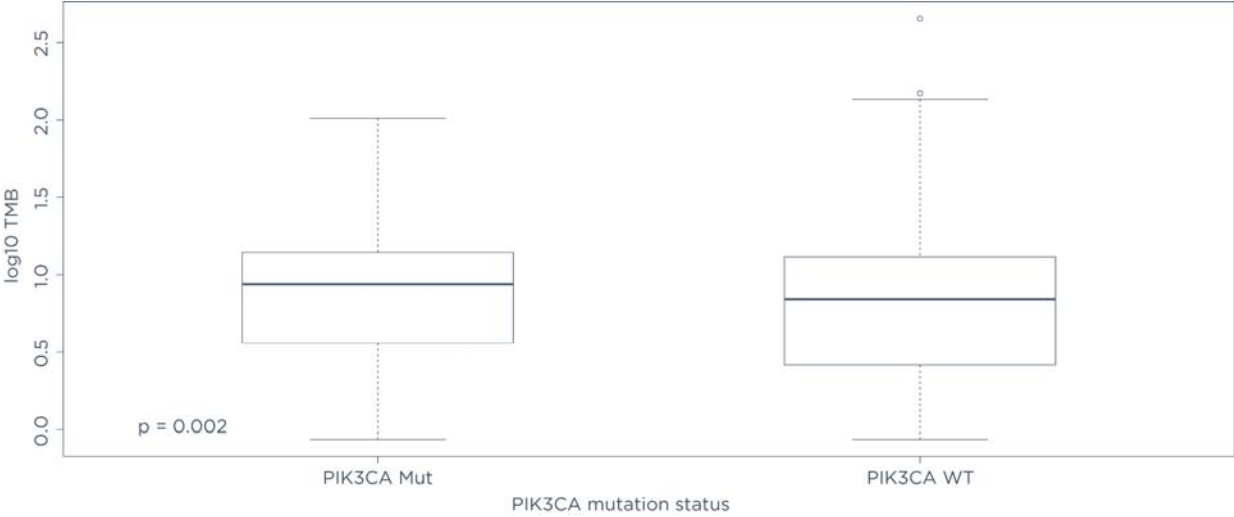

C – RET

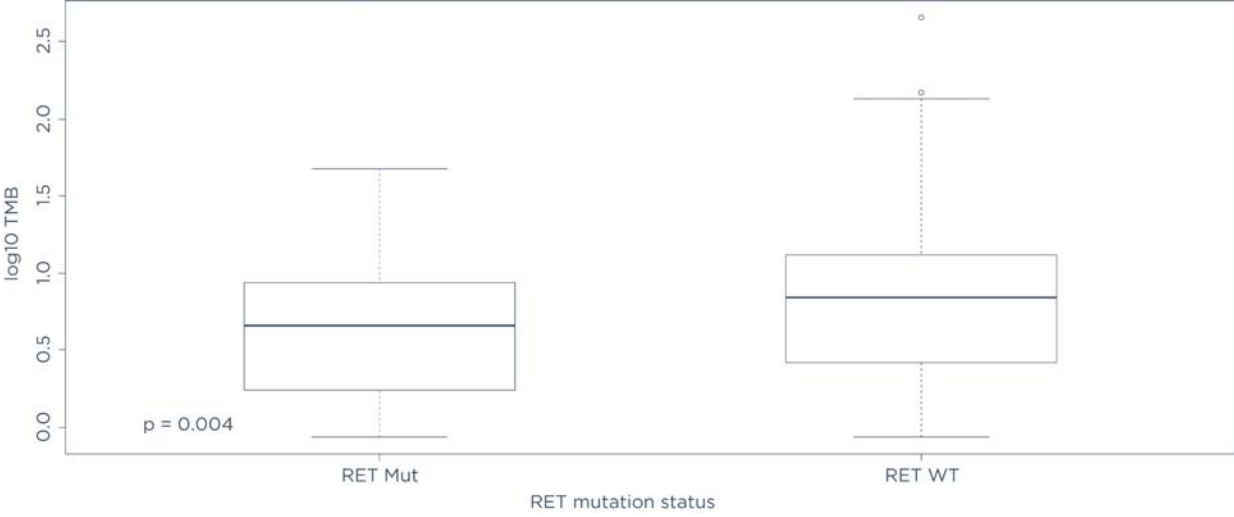

C – ROS1

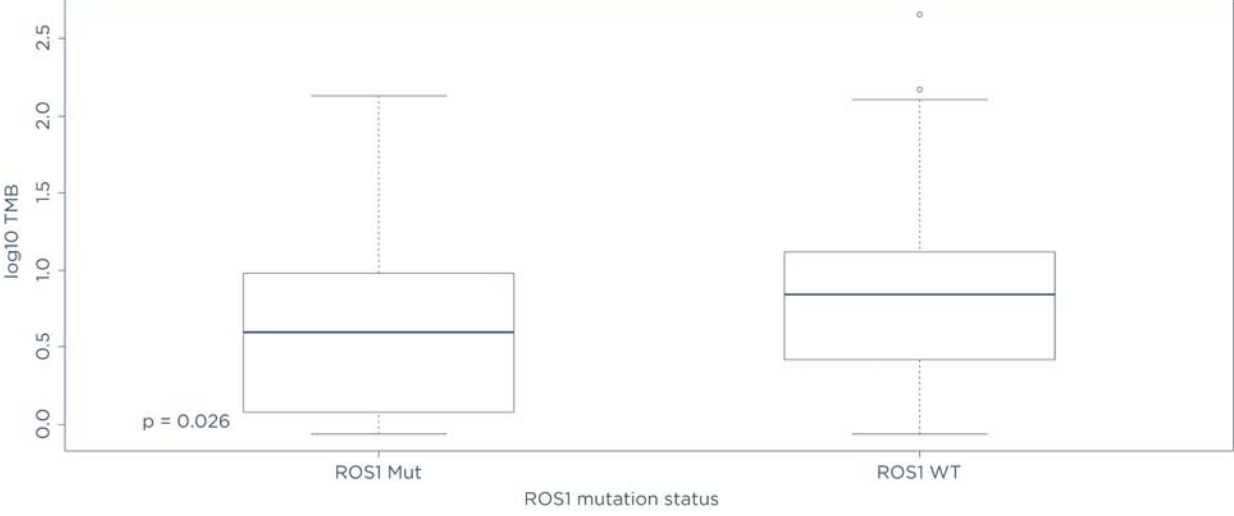

### **eFigure 3: Analysis of Tumor Mutation Burden (TMB) in NSCLC Cohort**

- (a) Comparison of median tumor mutational burden between patients with and without a history of smoking\*
- (b) Distribution of median tumor mutational burden stratified by presence of genetic mutation for all patients (green), those with a history of smoking (red), and those without a history of smoking (orange)
- (c) Comparison of median tumor mutational burden between presence or absence of specified genetic mutation\*

\* The heavy horizontal line is the median, the top and bottom edges of the box correspond to the upper and lower 25% respectively, the error bar extends to 1.5 times the interquartile range from the edge of the box, the open circles are outliers.

**eFigure 4. Genomic and Clinical Features in NSCLC Dataset**

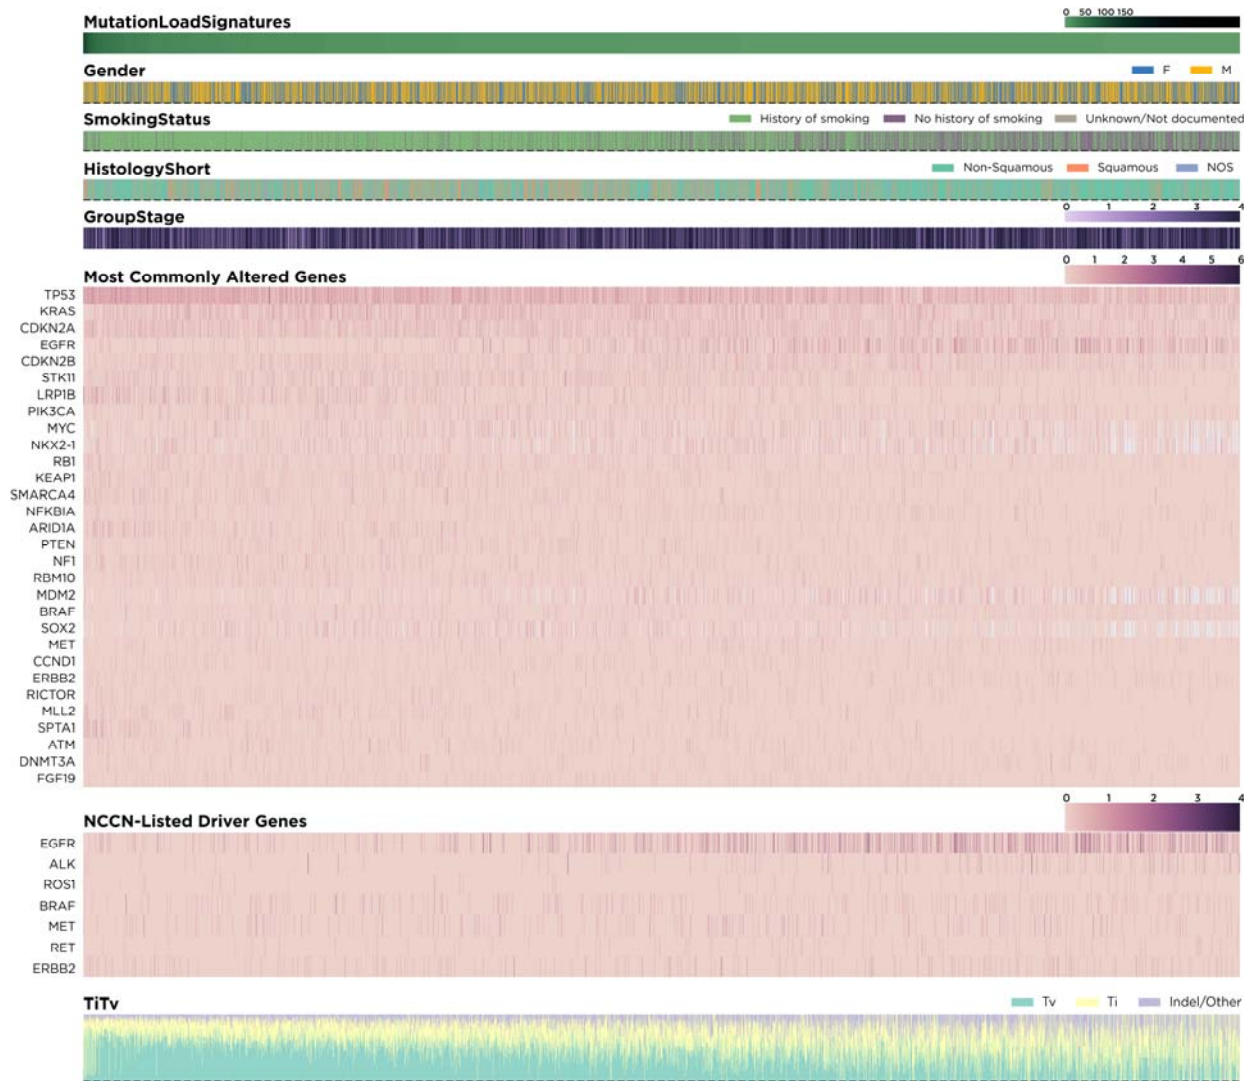

**eFigure 4: Genomic and Clinical Features in NSCLC Dataset**

Each patient is represented by a column in the heatmaps which define tumor mutational burden, gender, smoking status, pathology, stage of disease, mutational status of most commonly mutated and NCCN-driver genes, and type of mutation identified.

**eFigure 5. Clinical Predictors of Overall Survival in NSCLC**

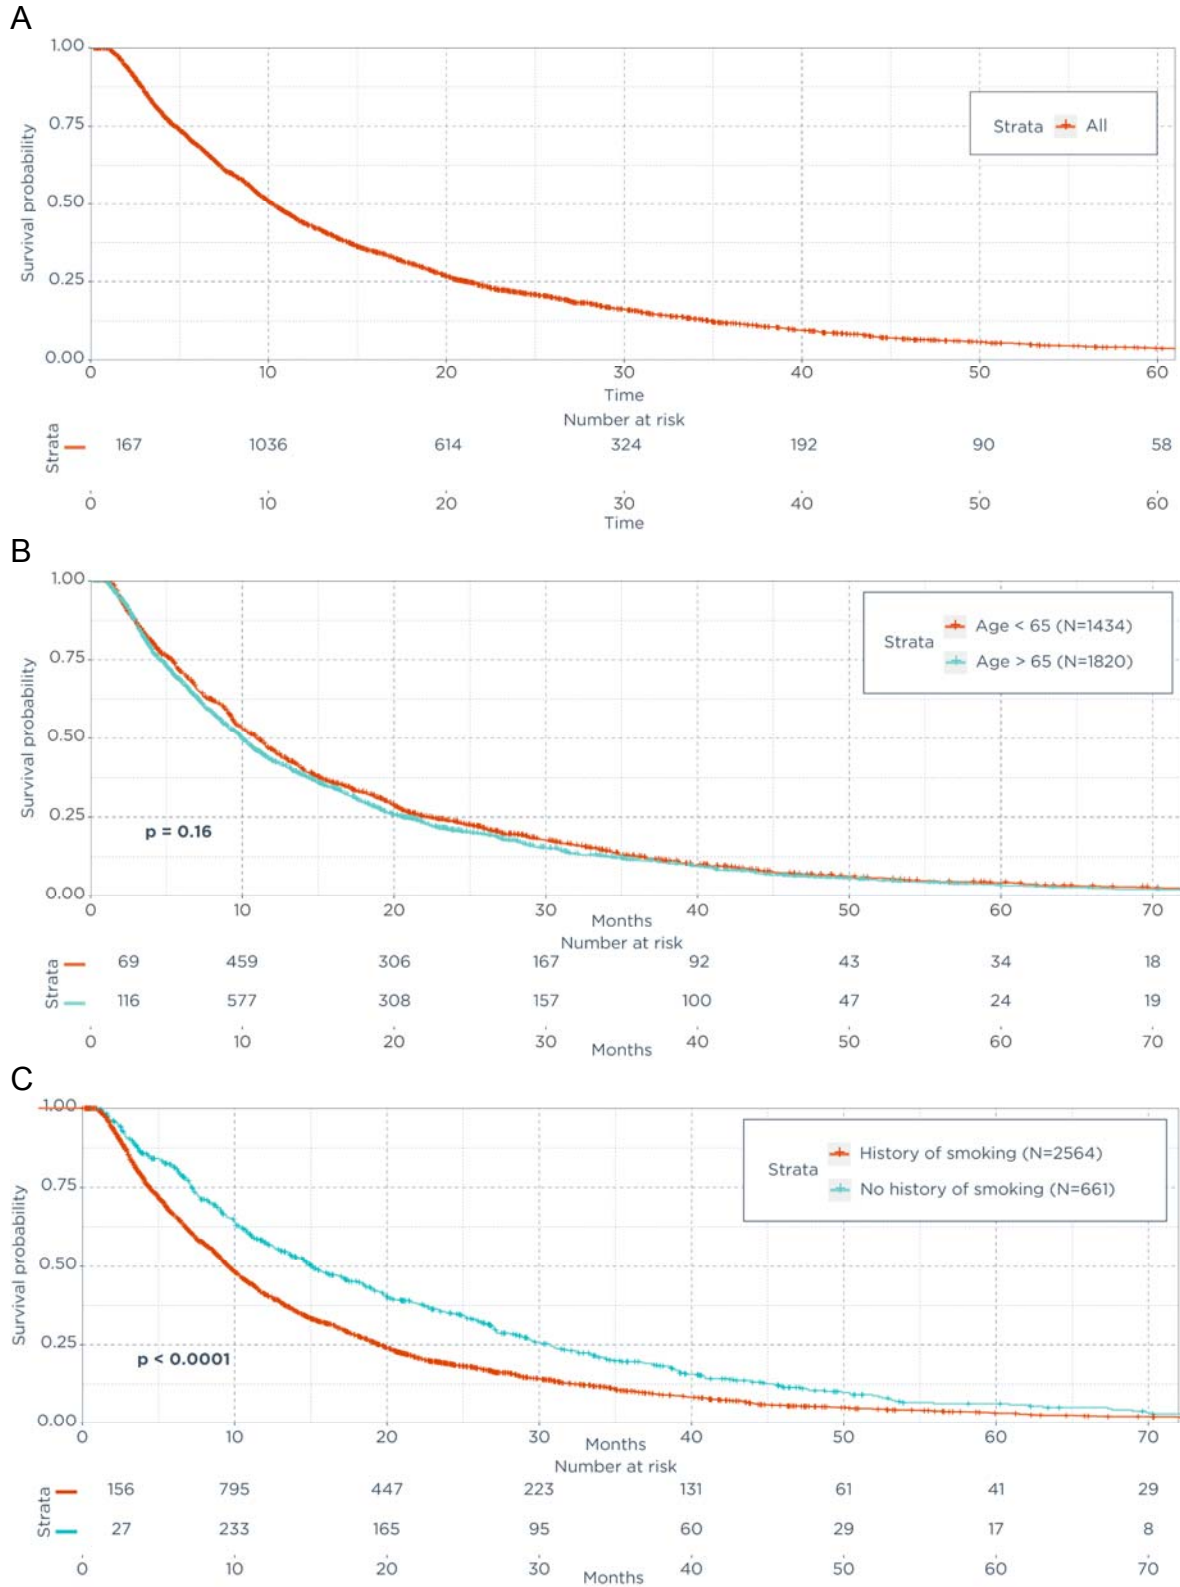

D

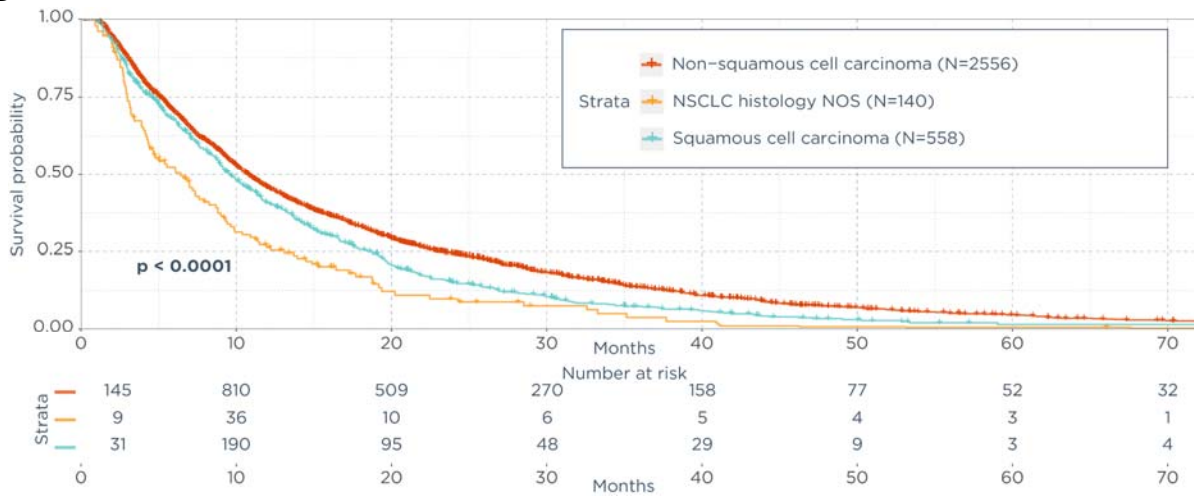

**eFigure 5: Clinical Predictors of Overall Survival in NSCLC**

- (a) Overall survival of patients from advanced diagnosis
- (b) Overall survival of patients from advanced diagnosis stratified by age greater or less than 65 years old at advanced diagnosis
- (c) Overall survival of patients from advanced diagnosis stratified by smoking history
- (d) Overall survival of patients from advanced diagnosis stratified by pathology

**eFigure 6. Genomic Predictors of Survival and Therapy Response**

**A**

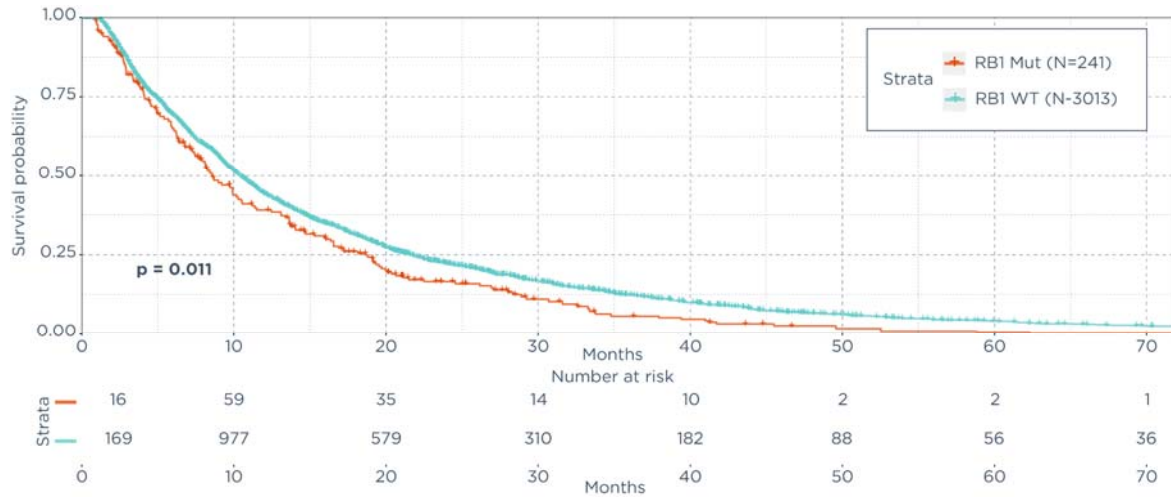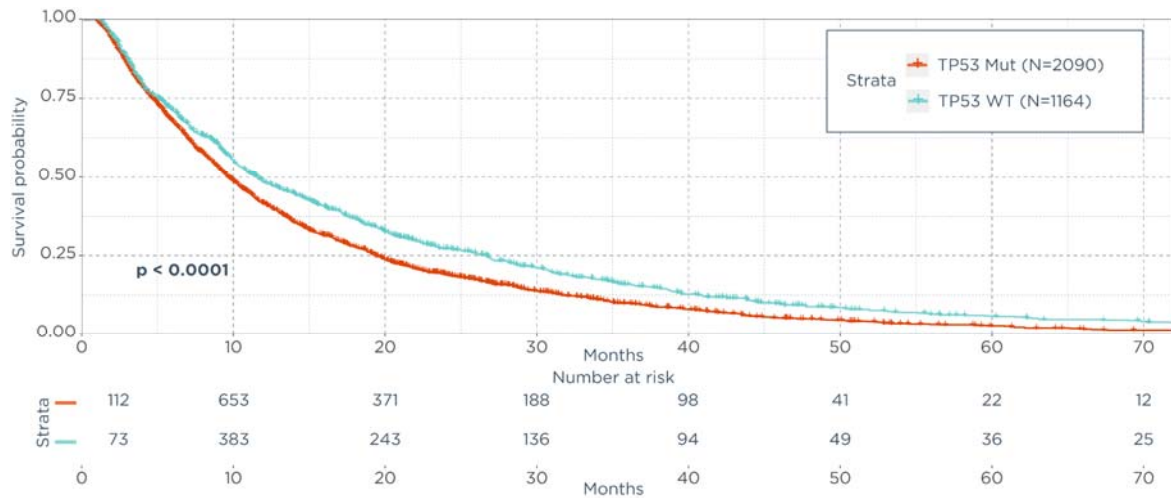

**B**

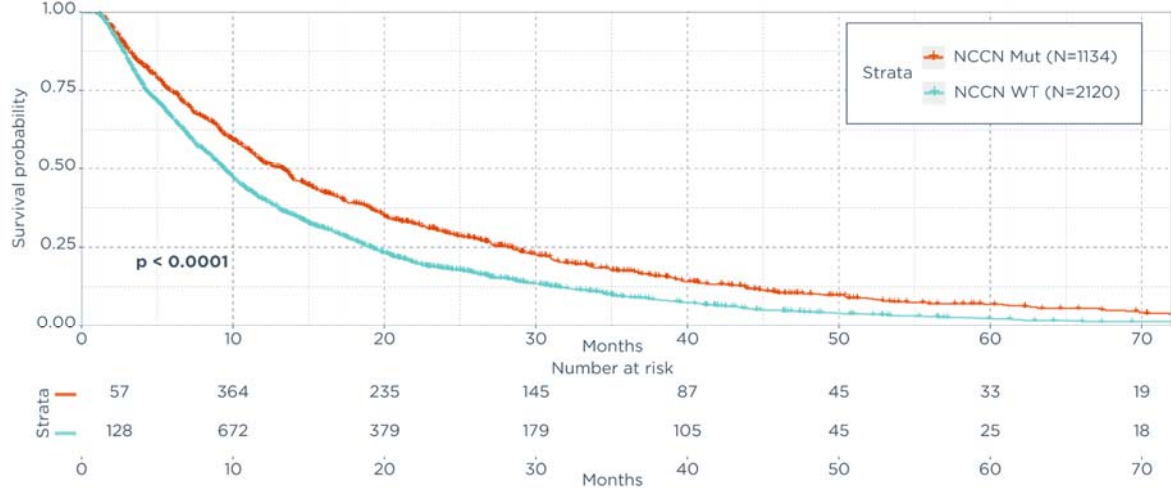

### C – ALK

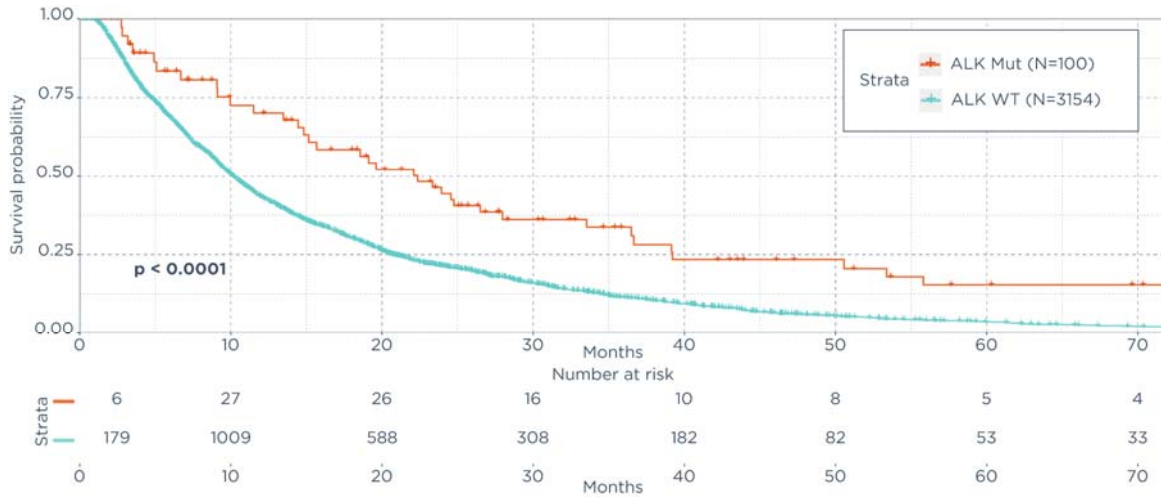

### C – BRAF

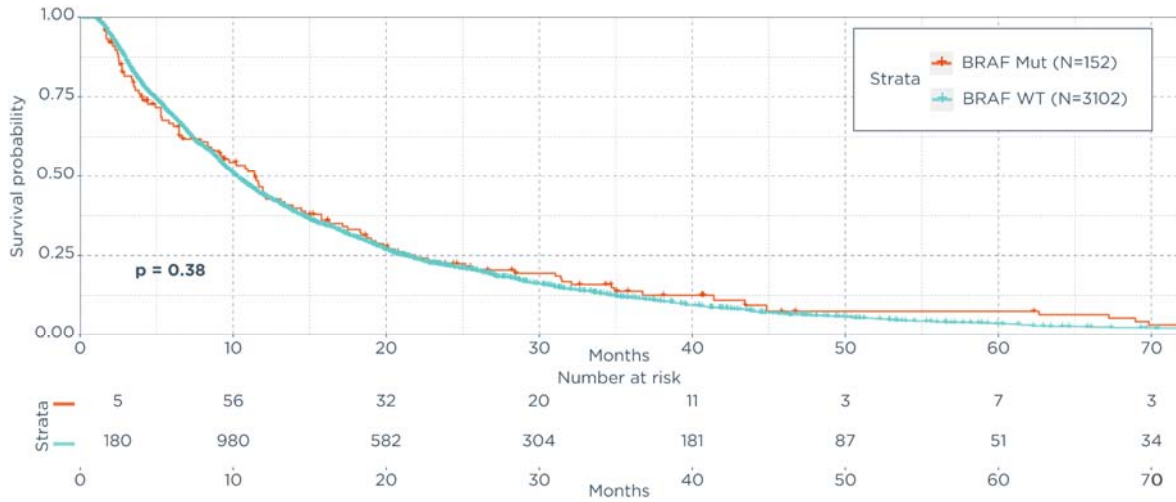

### C – EGFR

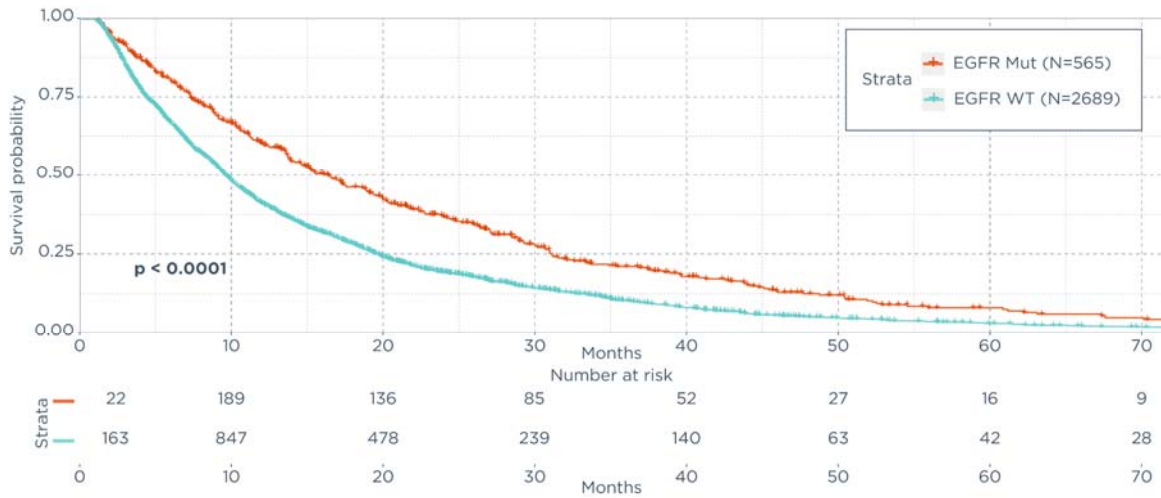



**C – ERBB2**

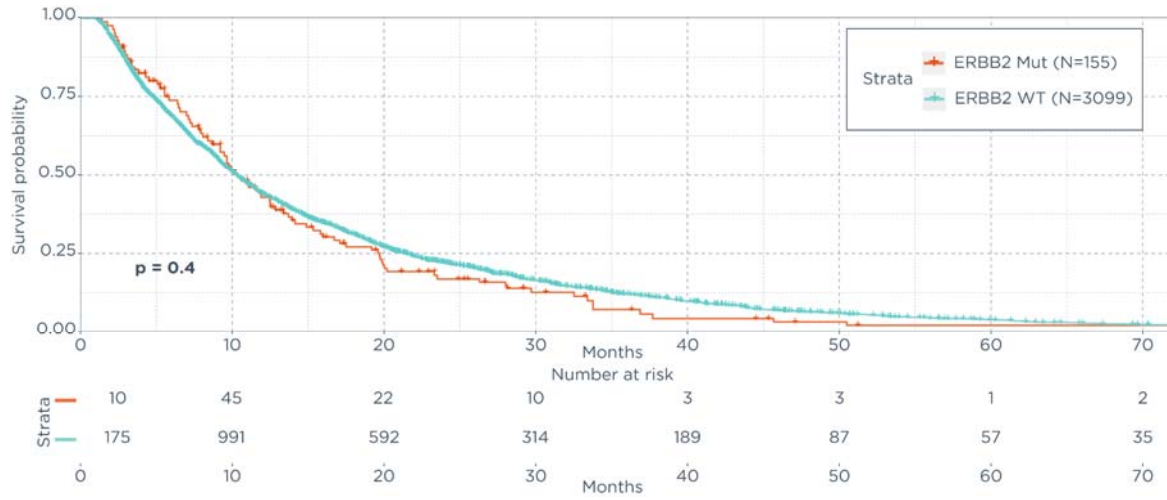

**C – MET**

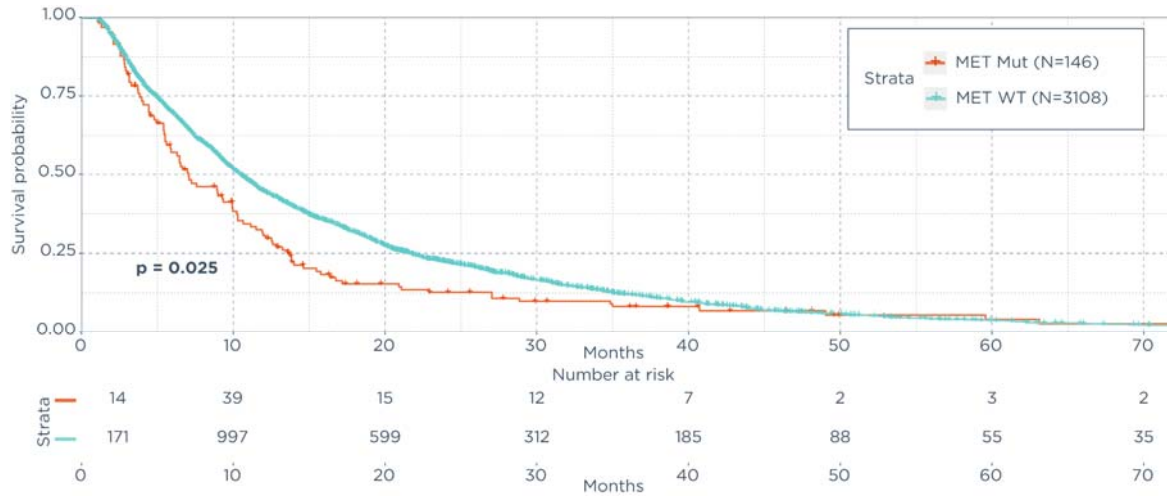

**C – PIK3CA**

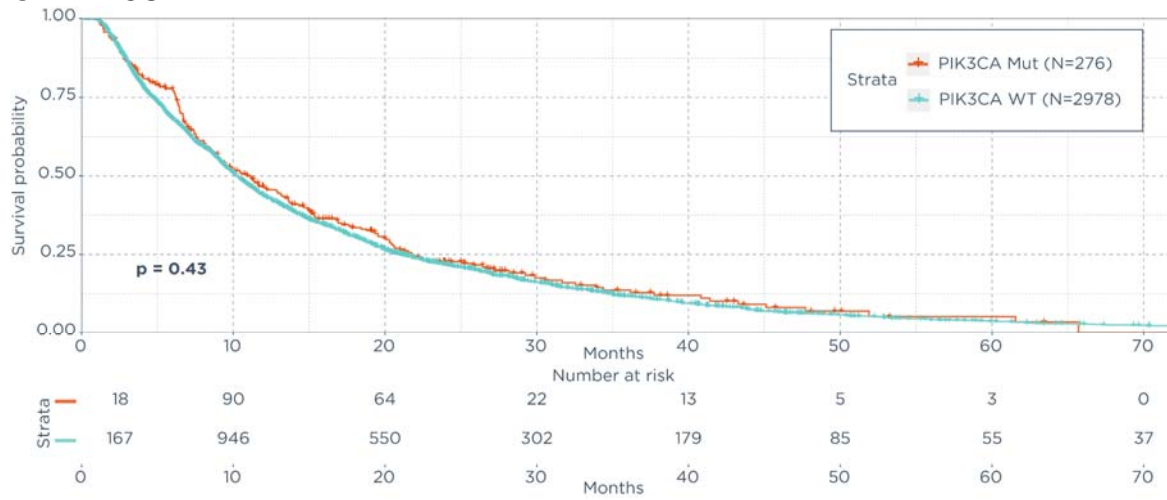



### C – RET

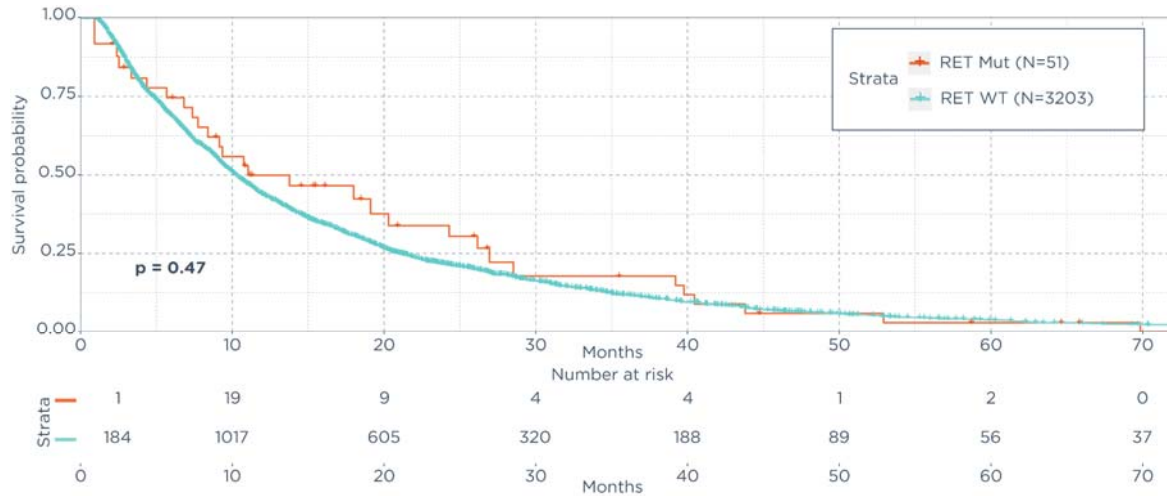

### C – ROS1

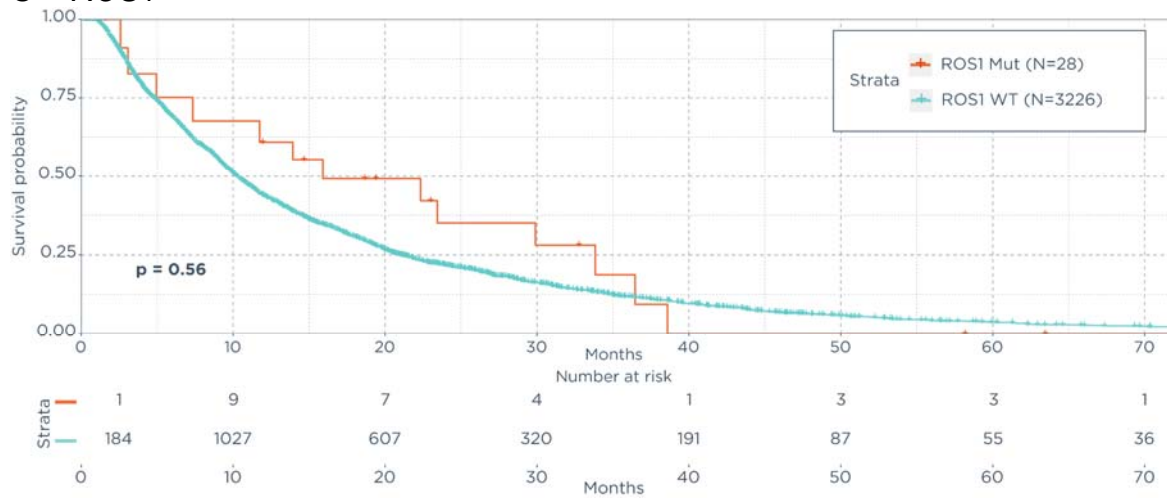

**eFigure 6: Genomic Predictors of Survival and Therapy Response**

- Overall survival from advanced diagnosis of patients stratified by mutation status of *RB1* (top) and *TP53* (bottom)
- Overall survival from advanced diagnosis of patients stratified by the presence of an NCCN driver mutation (NCCN drivers include *EGFR*, *ALK*, *ROS1*, *BRAF*, *MET*, *RET*, *ERBB2*)
- Overall survival from advanced diagnosis of patients stratified by presence of mutation in specified gene

**eFigure 7. Genomic Predictors of Survival and Therapy Response**

**A**

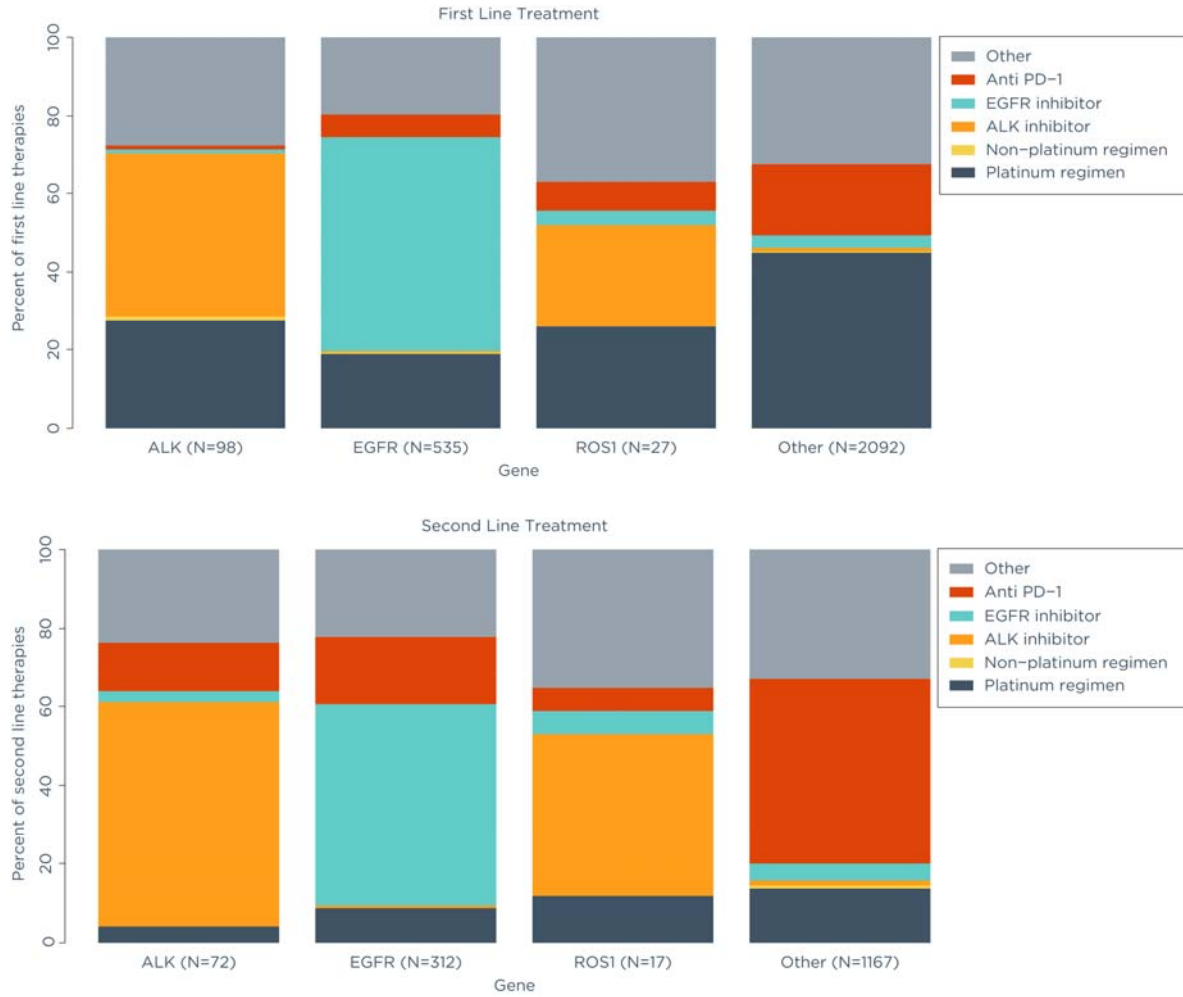

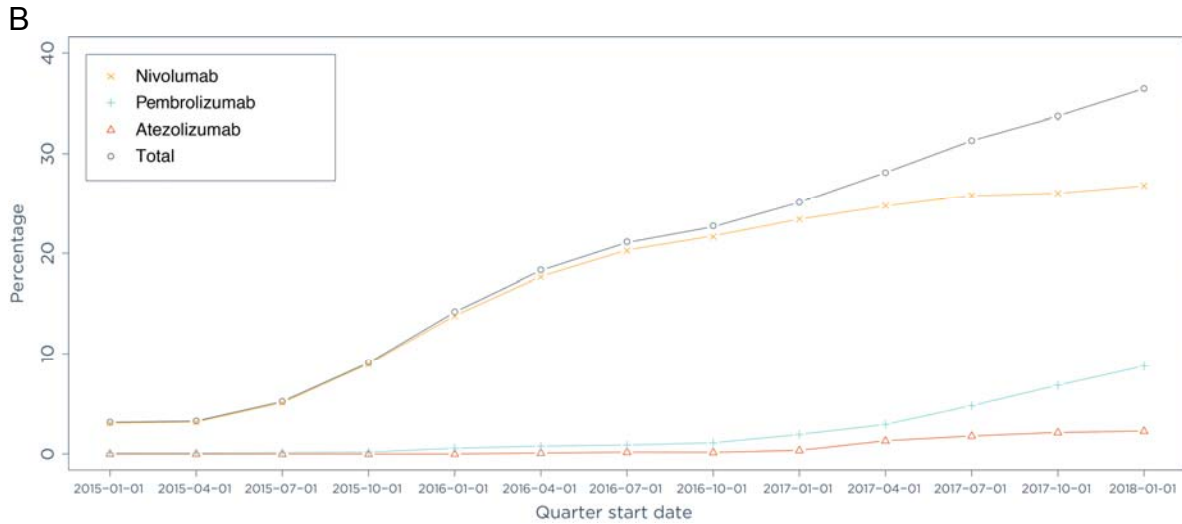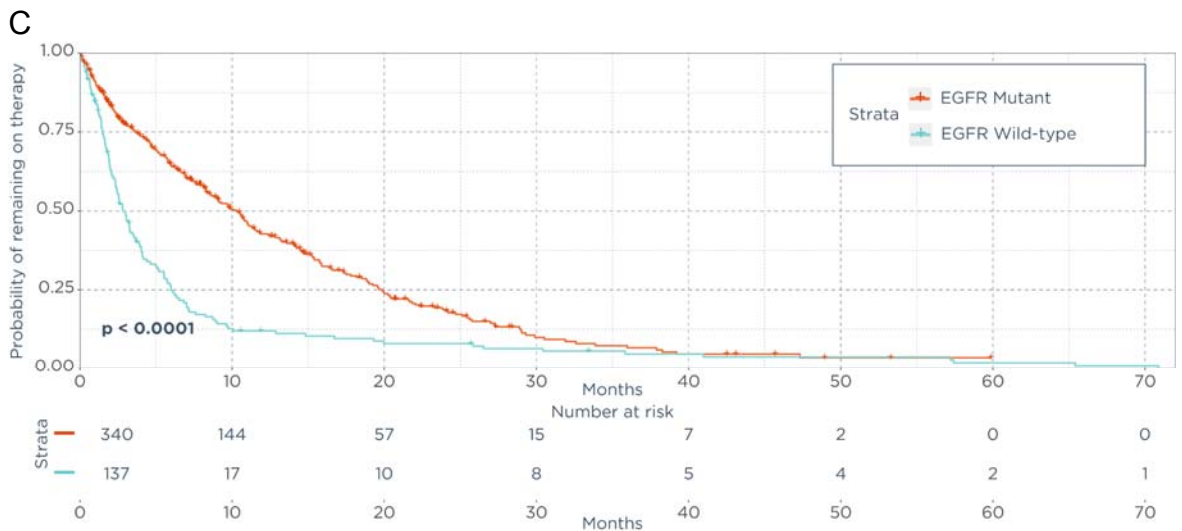

**eFigure 7: Genomic Predictors of Survival and Therapy Response**

- (a) First (top) and second (bottom) lines of therapy delivered to patients with advanced diagnoses, stratified by *EGFR*, *ALK*, and *ROS1* mutation status\*
- (b) Cumulative percentage of patients in the CGDB treated with anti-PD-1/PD-L1 therapies over time
- (c) Probability of remaining on therapy in patients treated with an *EGFR* inhibitor, stratified by presence of an *EGFR* mutation

\* “Other” therapies includes anti-VEGF agents (bevacizumab or ramucirumab), anti-*EGFR* antibodies, single agent chemotherapies, or clinical trial therapies. These data do not include patients who did not receive systemic therapy.

**eFigure 8.** Tumor Mutation Burden (TMB) in Immunotherapy Treated Cohort

**A**

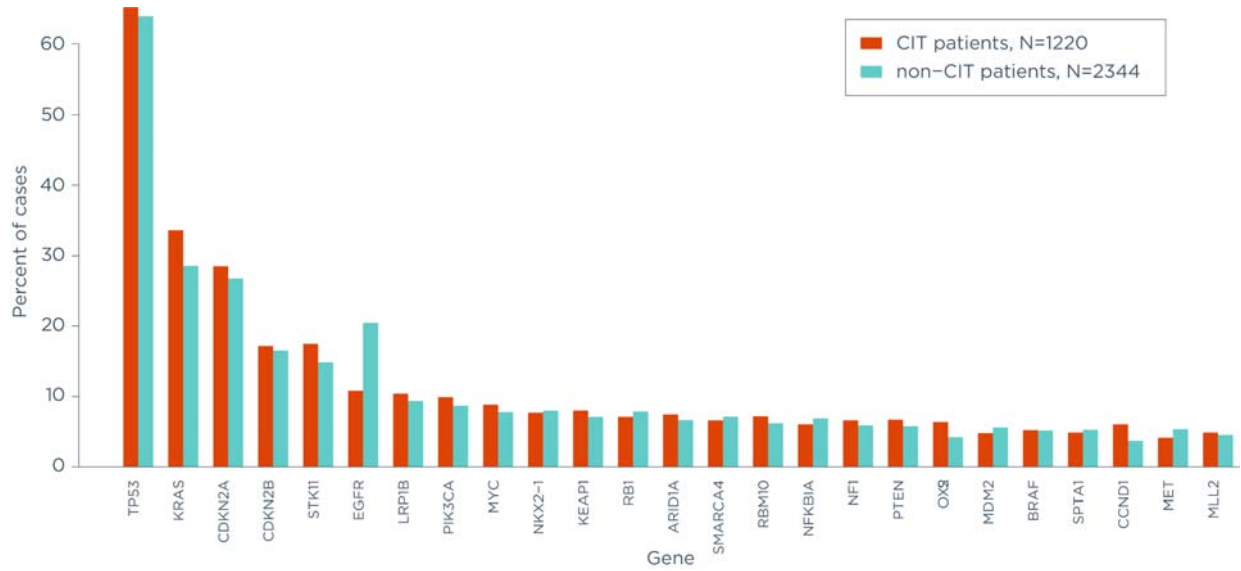

**B**

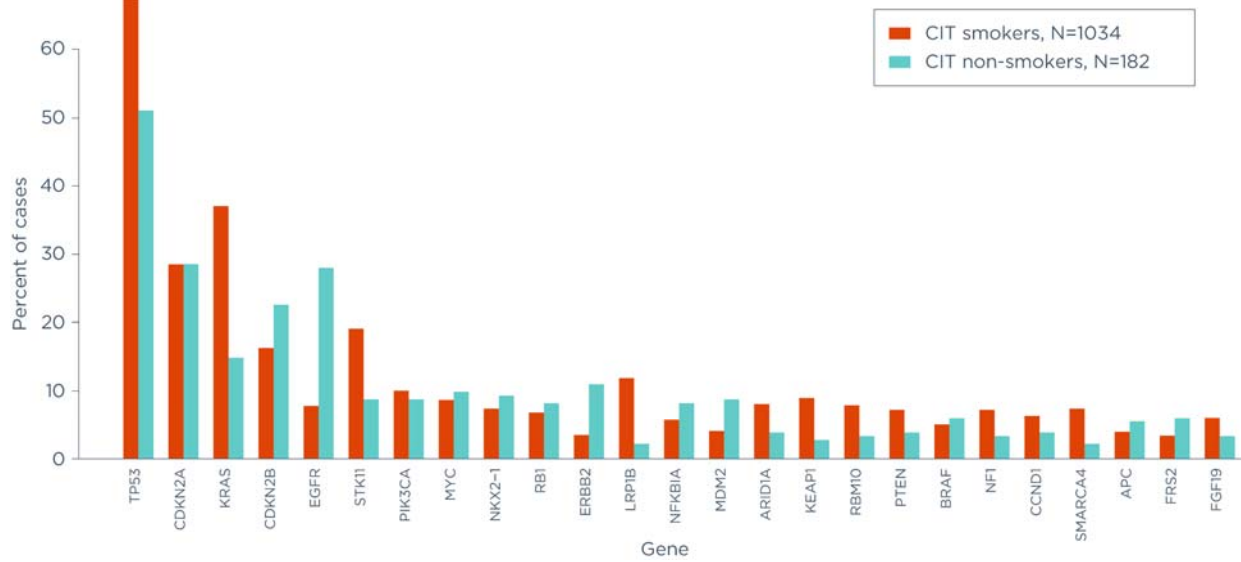

C

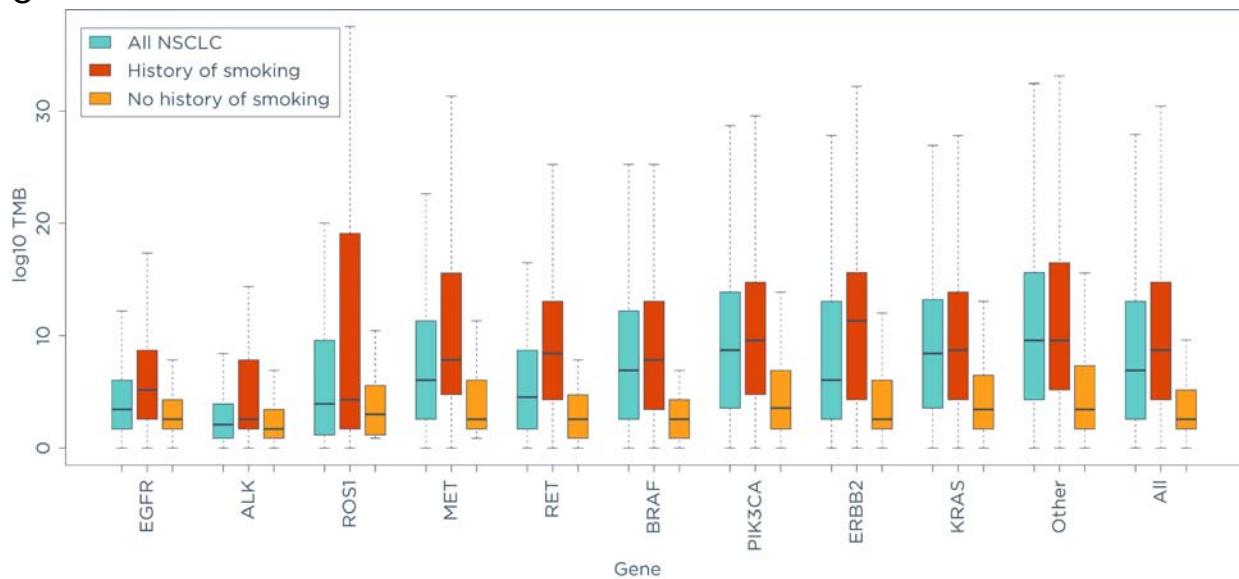

**eFigure 8: Tumor Mutation Burden (TMB) in Immunotherapy Treated Cohort**

- (a) Distribution of top 25 mutated genes in patients that received cancer immunotherapy (CIT, anti-PD-1/PD-L1 therapy) (red) and those that did not receive CIT (green)\*
- (b) Distribution of mutations in patients with a history of smoking (red) and no history of smoking (green) who received CIT\*
- (c) Distribution of median tumor mutational burden in anti-PD-1/PD-L1 treated patients stratified by presence of genetic mutation for all patients (green), those with a history of smoking (red), and those without a history of smoking (orange)†

\* For purposes of uniformity, only data from patients for whom tumor sequencing was done on the most updated FoundationOne platform (see eTable 1) are presented here.

† The heavy horizontal line is the median, the top and bottom edges of the box correspond to the upper and lower 25% respectively, the error bar extends to 1.5 times the interquartile range, the open circles are outliers.

**eFigure 9. Immunotherapy and Tumor Mutational Burden (TMB)**

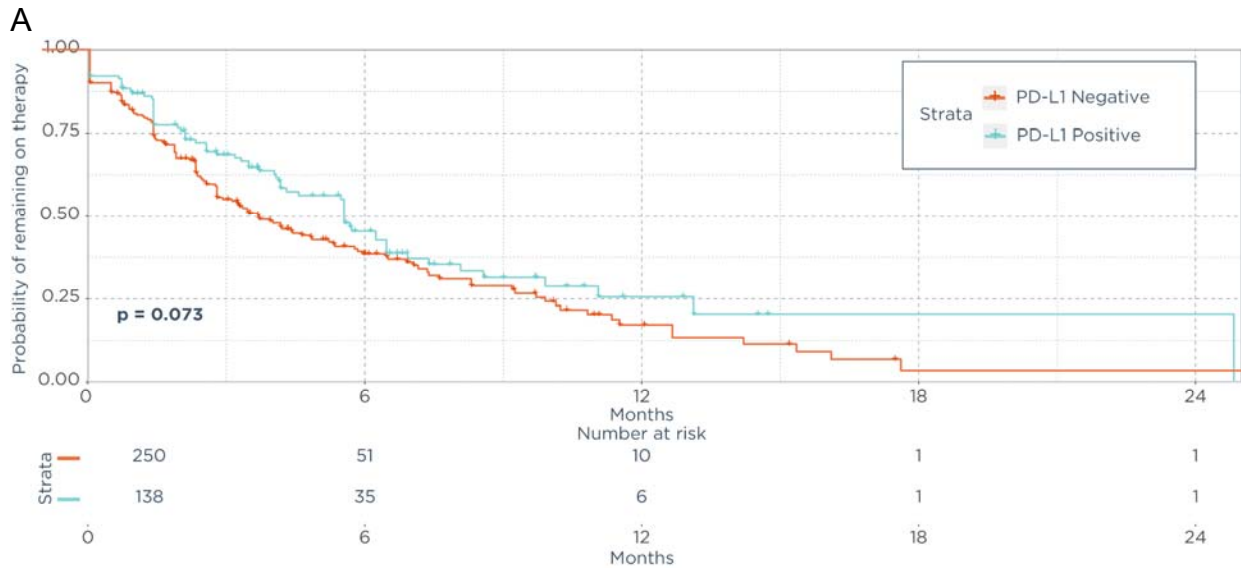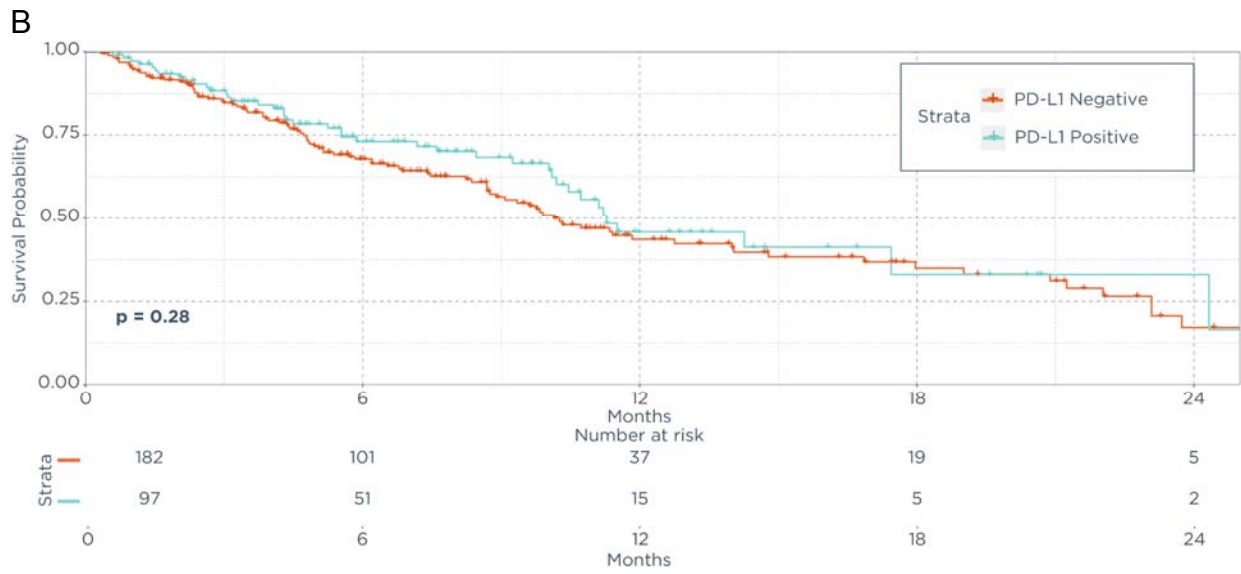

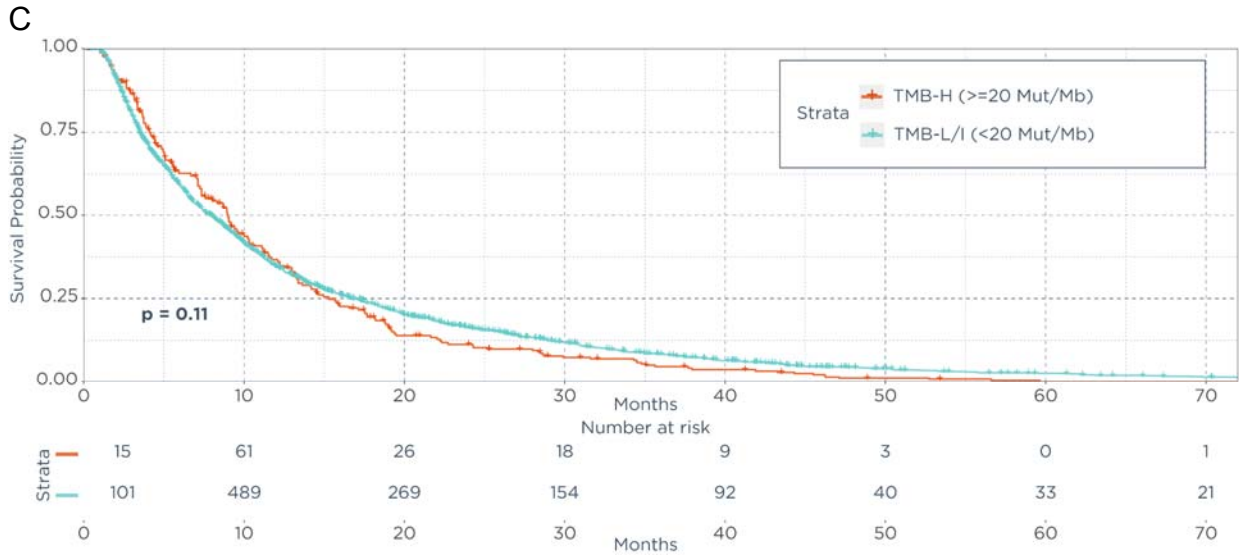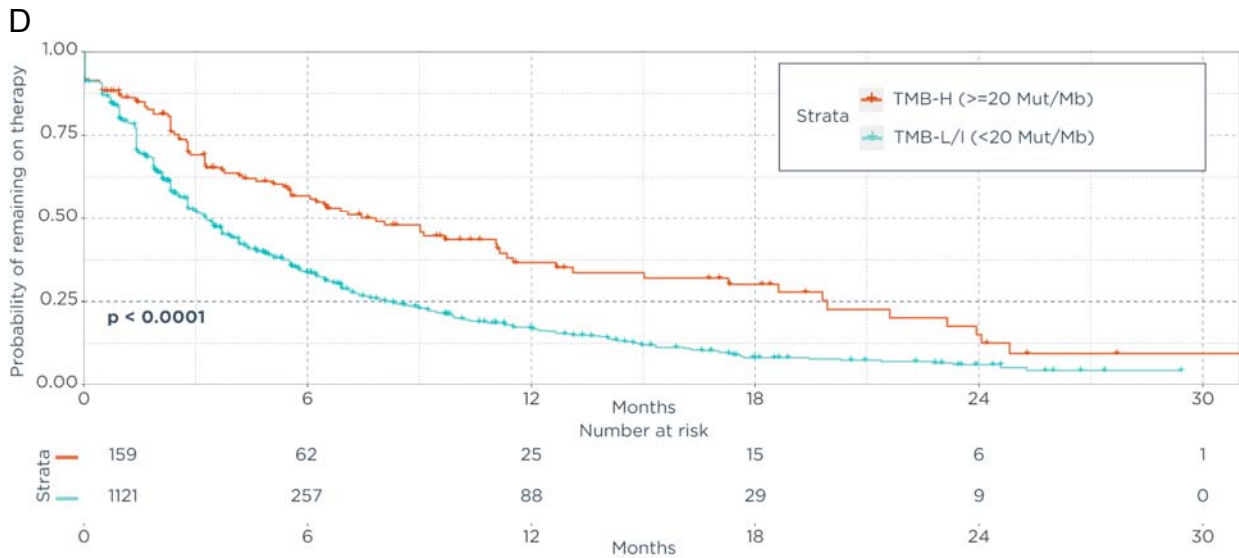

**E**

|             | TMB-L/I (N=789) | TMB-H (N=119) |
|-------------|-----------------|---------------|
| <b>PD</b>   | 342 (43.3%)     | 23 (19.3%)    |
| <b>SD</b>   | 233 (29.5%)     | 45 (37.8%)    |
| <b>PR</b>   | 198 (25.1%)     | 46 (38.7%)    |
| <b>CR</b>   | 16 (2.0%)       | 5 (4.25%)     |
| <b>CBR*</b> | 447 (56.7%)     | 96 (80.7%)    |

CBR  $\chi^2 p < 0.001$



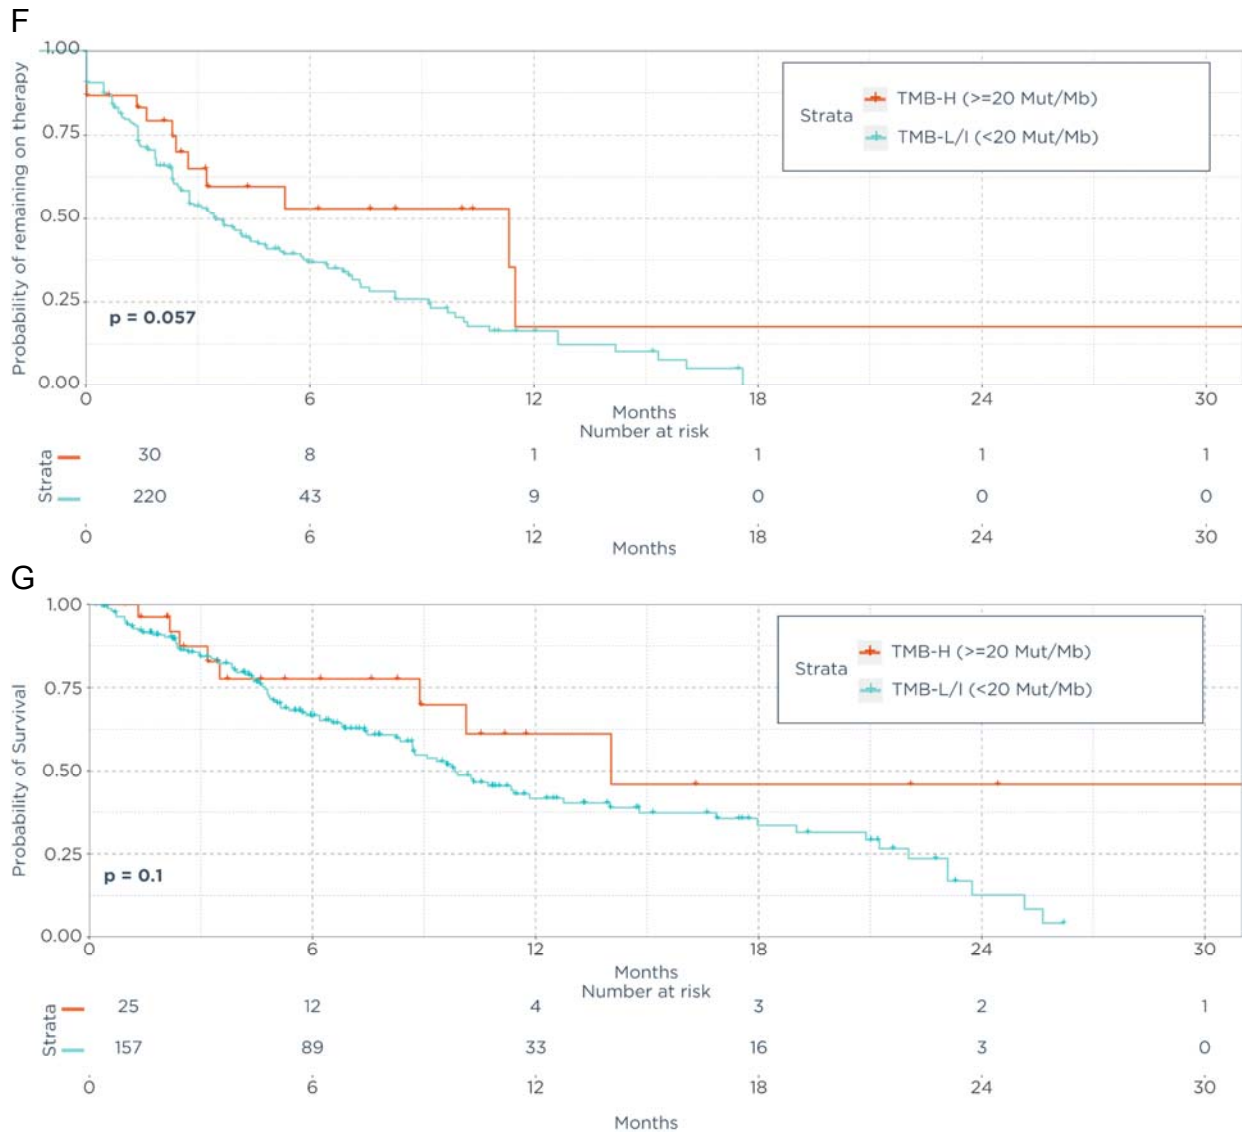

**eFigure 9: Immunotherapy and Tumor Mutational Burden (TMB)**

- Cumulative duration from start of anti-PD-1/PD-L1 therapy, stratified by PD-L1 status
- Overall survival from start of anti-PD-1/PD-L1 therapy, stratified by PD-L1 status
- Overall survival from advanced diagnosis of patients without anti-PD-L1/PD-1 exposure in cohort, stratified by degree of tumor mutational burden
- Duration on anti-PD-1/PD-L1 therapy from start of therapy, stratified by degree of tumor mutational burden (TMB-H  $\geq 20$  mutations/Mb, TMB-L/I  $< 20$  mutations/Mb)
- Maximal response to anti-PD-1/PD-L1 therapy, as documented in the EHR by the treating clinician, stratified by degree of tumor mutational burden (TMB-H  $\geq 20$  mutations/Mb, TMB-L/I  $< 20$  mutations/Mb)
- Duration on anti-PD-1/PD-L1 therapy from start of therapy in PD-L1 negative patients, stratified by degree of tumor mutational burden



- (g) Overall survival from start of anti-PD-1/PD-L1 therapy in PD-L1 negative patients, stratified by degree of tumor mutational burden

\* CBR refers to non-progressive disease, the sum of complete response (CR), partial response (PR), and stable disease (SD)

**eTable 1.** Composition of Patients Sequenced on the Different Versions of the FoundationOne Sequencing Platforms

| FoundationOne Version | Number of Patients | Percentage of CGDB | Number of Genes Sequenced for Exonic Alterations | Number of Genes Sequenced for Rearrangements |
|-----------------------|--------------------|--------------------|--------------------------------------------------|----------------------------------------------|
| T7                    | 3564               | 87.7%              | 395                                              | 31                                           |
| T5a                   | 469                | 11.5%              | 287 (+34 ADME)                                   | 19                                           |
| T4b                   | 28                 | 1.0%               | 222 (+34 ADME)                                   | 14                                           |

**Note:** ADME refers to genes related to drug bioavailability or metabolism.

**eTable 2.** Individual Characteristics of 4064 Non-Advanced and Advanced NSCLC With Wild Type or Altered Variants of a Gene Are Compared. For each gene, we output a traditional baseline table (based off of Table 1) of patient characteristics.

**Interpretation:** A p-value < 0.05 suggests that the difference in the distribution or proportion of patients with the characteristic of interest differs significantly between those patients who do or do not have that genetic alteration. For example, those NSCLC patients with an alteration in the *ALK* gene had a significantly higher proportion of squamous cell carcinoma histology when compared to those NSCLC patients who had the wild type *ALK* gene.

**Note 1:** When appropriate, we used the  $\chi^2$  test (for categorical variables, e.g., histology) or Fisher's exact test (for categorical variables with small strata based on the expected values, <5 patients, e.g., race), and Kruskal-Wallis test (for continuous variables, e.g., age) to assess the significance of these differences between sub-cohorts.

**Note 2:** Only "known" or "likely" pathogenic (as annotated by Foundation Medicine) short variants, copy number variants, and rearrangements were included.

**Note 3:** "Advanced" disease status is defined as stage IIIB / IV disease at diagnosis or recurrent or metastatic disease at any stage.

**Note 4:** Summaries of characteristics related to an advanced diagnosis date (age at advanced diagnosis date, months between advanced diagnosis date and FMI test) are calculated using just those patients with an advanced diagnosis date.

**Note 5:** The summary of group stage excludes patients with unknown group stage.

**eTable 2 (Continued)***Cohort Sociodemographic and Tumor Characteristics by EGFR*

|                                                                      | EGFR mutant<br>N=701 | EGFR wild-type<br>N=3363 | p.overall |
|----------------------------------------------------------------------|----------------------|--------------------------|-----------|
| Age at advanced diagnosis (median, [IQR])                            | 65.0 [57.0;74.0]     | 67.0 [59.0;73.0]         | 0.089     |
| Gender:                                                              |                      |                          | <0.001    |
| Female                                                               | 440 (62.8%)          | 1669 (49.6%)             |           |
| Male                                                                 | 261 (37.2%)          | 1694 (50.4%)             |           |
| Smoking status:                                                      |                      |                          | <0.001    |
| History of smoking                                                   | 364 (51.9%)          | 2819 (83.8%)             |           |
| No history of smoking                                                | 329 (46.9%)          | 499 (14.8%)              |           |
| Unknown/Not documented                                               | 8 (1.14%)            | 45 (1.3%)                |           |
| Race:                                                                |                      |                          | <0.001    |
| Asian                                                                | 59 (8.4%)            | 67 (2.00%)               |           |
| Black or African American                                            | 28 (4.0%)            | 199 (5.9%)               |           |
| Hispanic or Latino                                                   | 3 (0.4%)             | 3 (0.1%)                 |           |
| Other Race                                                           | 75 (10.7%)           | 297 (8.8%)               |           |
| Unknown/unavailable                                                  | 109 (15.5%)          | 408 (12.1%)              |           |
| White                                                                | 427 (60.9%)          | 2389 (71.0%)             |           |
| Disease status: Advanced                                             | 630 (89.9%)          | 2892 (86.0%)             | 0.007     |
| Vital status: Has documented date of death                           | 283 (40.4%)          | 1663 (49.4%)             | <0.001    |
| Stage of disease at initial diagnosis:                               |                      |                          | <0.001    |
| 0                                                                    | 0 (0.00%)            | 1 (0.03%)                |           |
| I                                                                    | 70 (10.4%)           | 318 (10.0%)              |           |
| II                                                                   | 36 (5.4%)            | 273 (8.6%)               |           |
| III                                                                  | 109 (16.2%)          | 737 (23.2%)              |           |
| IV                                                                   | 458 (68.1%)          | 1846 (58.1%)             |           |
| Histologic subtype:                                                  |                      |                          | <0.001    |
| Non-squamous cell carcinoma                                          | 642 (91.6%)          | 2511 (74.7%)             |           |
| NSCLC histology NOS                                                  | 18 (2.6%)            | 167 (5.0%)               |           |
| Squamous cell carcinoma                                              | 41 (5.6%)            | 685 (20.4%)              |           |
| No. of lines of therapy received:                                    |                      |                          | <0.001    |
| 1                                                                    | 223 (31.8%)          | 960 (28.5%)              |           |
| 2                                                                    | 146 (20.8%)          | 665 (19.8%)              |           |
| 3+                                                                   | 166 (23.7%)          | 589 (17.5%)              |           |
| No line of therapy captured in database                              | 166 (23.7%)          | 1149 (34.2%)             |           |
| Follow-up [days] from initial diagnosis (median, [IQR])              | 42.0 [16.0;85.0]     | 32.0 [11.0;68.0]         | <0.001    |
| Months between advanced diagnosis and FMI test dates (median, [IQR]) | 3.00 [1.00;18.0]     | 2.00 [1.00;10.00]        | <0.001    |

**eTable 2 (Continued)***Cohort Sociodemographic and Tumor Characteristics by ALK*

|                                                                      | ALK mutant<br>N=128 | ALK wild-type<br>N=3936 | p.overall |
|----------------------------------------------------------------------|---------------------|-------------------------|-----------|
| Age at advanced diagnosis (median, [IQR])                            | 58.0 [46.0;66.0]    | 67.0 [59.0;74.0]        | <0.001    |
| Gender:                                                              |                     |                         | 0.709     |
| Female                                                               | 69 (53.9%)          | 2040 (51.8%)            |           |
| Male                                                                 | 59 (46.1%)          | 1896 (48.2%)            |           |
| Smoking status:                                                      |                     |                         | <0.001    |
| History of smoking                                                   | 54 (42.2%)          | 3129 (79.5%)            |           |
| No history of smoking                                                | 73 (57.0%)          | 755 (19.2%)             |           |
| Unknown/Not documented                                               | 1 (0.78%)           | 52 (1.32%)              |           |
| Race:                                                                |                     |                         | 0.008     |
| Asian                                                                | 10 (7.8%)           | 116 (3.0%)              |           |
| Black or African American                                            | 11 (8.6%)           | 216 (5.5%)              |           |
| Hispanic or Latino                                                   | 1 (0.8%)            | 5 (0.13%)               |           |
| Other Race                                                           | 13 (10.2%)          | 359 (9.1%)              |           |
| Unknown/unavailable                                                  | 12 (9.4%)           | 505 (12.8%)             |           |
| White                                                                | 81 (63.3%)          | 2735 (69.5%)            |           |
| Disease status: Advanced                                             | 115 (89.8%)         | 3407 (86.6%)            | 0.345     |
| Vital status: Has documented date of death                           | 40 (31.2%)          | 1906 (48.4%)            | <0.001    |
| Stage of disease at initial diagnosis:                               |                     |                         | <0.001    |
| 0                                                                    | 0 (0.00%)           | 1 (0.03%)               |           |
| I                                                                    | 1 (0.8%)            | 387 (10.4%)             |           |
| II                                                                   | 8 (6.5%)            | 301 (8.1%)              |           |
| III                                                                  | 26 (21.0%)          | 820 (22.0%)             |           |
| IV                                                                   | 89 (71.8%)          | 2215 (59.5%)            |           |
| Histologic subtype:                                                  |                     |                         | <0.001    |
| Non-squamous cell carcinoma                                          | 119 (93.0%)         | 3034 (77.1%)            |           |
| NSCLC histology NOS                                                  | 4 (3.1%)            | 181 (4.6%)              |           |
| Squamous cell carcinoma                                              | 5 (3.9%)            | 721 (18.3%)             |           |
| No. of lines of therapy received:                                    |                     |                         | <0.001    |
| 1                                                                    | 26 (20.3%)          | 1157 (29.4%)            |           |
| 2                                                                    | 27 (21.1%)          | 784 (19.9%)             |           |
| 3+                                                                   | 45 (35.2%)          | 710 (18.0%)             |           |
| No line of therapy captured in database                              | 30 (23.4%)          | 1285 (32.6%)            |           |
| Follow-up [days] from initial diagnosis (median, [IQR])              | 58.5 [13.2;96.2]    | 33.0 [12.0;70.0]        | 0.003     |
| Months between advanced diagnosis and FMI test dates (median, [IQR]) | 6.00 [1.00;21.0]    | 2.00 [1.00;11.0]        | 0.001     |

**eTable 2 (Continued)***Cohort Sociodemographic and Tumor Characteristics by ROS1*

|                                                                      | ROS1 mutant<br>N=42 | ROS1 wild-type<br>N=4022 | p.overall |
|----------------------------------------------------------------------|---------------------|--------------------------|-----------|
| Age at advanced diagnosis (median, [IQR])                            | 61.0 [53.0;68.8]    | 66.0 [58.0;73.0]         | 0.016     |
| Gender:                                                              |                     |                          | 0.017     |
| Female                                                               | 30 (71.4%)          | 2079 (51.7%)             |           |
| Male                                                                 | 12 (28.6%)          | 1943 (48.3%)             |           |
| Smoking status:                                                      |                     |                          | <0.001    |
| History of smoking                                                   | 21 (50.0%)          | 3162 (78.6%)             |           |
| No history of smoking                                                | 20 (47.6%)          | 808 (20.1%)              |           |
| Unknown/Not documented                                               | 1 (2.4%)            | 52 (1.3%)                |           |
| Race:                                                                |                     |                          | 0.622     |
| Asian                                                                | 1 (2.4%)            | 125 (3.1%)               |           |
| Black or African American                                            | 4 (9.5%)            | 223 (5.5%)               |           |
| Hispanic or Latino                                                   | 0 (0.00%)           | 6 (0.2%)                 |           |
| Other Race                                                           | 5 (11.9%)           | 367 (9.1%)               |           |
| Unknown/unavailable                                                  | 6 (14.3%)           | 511 (12.7%)              |           |
| White                                                                | 26 (61.9%)          | 2790 (69.4%)             |           |
| Disease status: Advanced                                             | 34 (81.0%)          | 3488 (86.7%)             | 0.386     |
| Vital status: Has documented date of death                           | 18 (42.9%)          | 1928 (47.9%)             | 0.617     |
| Stage of disease at initial diagnosis:                               |                     |                          | 0.955     |
| 0                                                                    | 0 (0.00%)           | 1 (0.03%)                |           |
| I                                                                    | 4 (10.5%)           | 384 (10.1%)              |           |
| II                                                                   | 3 (7.9%)            | 306 (8.0%)               |           |
| III                                                                  | 7 (18.4%)           | 839 (22.0%)              |           |
| IV                                                                   | 24 (63.2%)          | 2280 (59.8%)             |           |
| Histologic subtype:                                                  |                     |                          | 0.142     |
| Non-squamous cell carcinoma                                          | 37 (88.1%)          | 3116 (77.5%)             |           |
| NSCLC histology NOS                                                  | 2 (4.8%)            | 183 (4.6%)               |           |
| Squamous cell carcinoma                                              | 3 (7.1%)            | 723 (18.0%)              |           |
| No. of lines of therapy received:                                    |                     |                          | 0.859     |
| 1                                                                    | 10 (23.8%)          | 1173 (29.2%)             |           |
| 2                                                                    | 8 (19.0%)           | 803 (20.0%)              |           |
| 3+                                                                   | 9 (21.4%)           | 746 (18.5%)              |           |
| No line of therapy captured in database                              | 15 (35.7%)          | 1300 (32.3%)             |           |
| Follow-up [days] from initial diagnosis (median, [IQR])              | 51.0 [10.5;121]     | 34.0 [12.0;71.0]         | 0.118     |
| Months between advanced diagnosis and FMI test dates (median, [IQR]) | 6.00 [1.00;39.0]    | 2.00 [1.00;11.0]         | 0.059     |

**eTable 2 (Continued)***Cohort Sociodemographic and Tumor Characteristics by KRAS*

|                                                                      | KRAS mutant<br>N=1205 | KRAS wild-type<br>N=2859 | p.overall |
|----------------------------------------------------------------------|-----------------------|--------------------------|-----------|
| Age at advanced diagnosis (median, [IQR])                            | 66.0 [58.0;73.0]      | 66.0 [58.0;74.0]         | 0.588     |
| Gender:                                                              |                       |                          | <0.001    |
| Female                                                               | 733 (60.8%)           | 1376 (48.1%)             |           |
| Male                                                                 | 472 (39.2%)           | 1483 (51.9%)             |           |
| Smoking status:                                                      |                       |                          | <0.001    |
| History of smoking                                                   | 1093 (90.7%)          | 2090 (73.1%)             |           |
| No history of smoking                                                | 104 (8.6%)            | 724 (25.3%)              |           |
| Unknown/Not documented                                               | 8 (0.66%)             | 45 (1.57%)               |           |
| Race:                                                                |                       |                          | <0.001    |
| Asian                                                                | 13 (1.1%)             | 113 (4.0%)               |           |
| Black or African American                                            | 65 (5.4%)             | 162 (5.7%)               |           |
| Hispanic or Latino                                                   | 2 (0.2%)              | 4 (0.1%)                 |           |
| Other Race                                                           | 95 (7.9%)             | 277 (9.7%)               |           |
| Unknown/unavailable                                                  | 142 (11.8%)           | 375 (13.1%)              |           |
| White                                                                | 888 (73.7%)           | 1928 (67.4%)             |           |
| Disease status: Advanced                                             | 1066 (88.5%)          | 2456 (85.9%)             | 0.032     |
| Vital status: Has documented date of death                           | 598 (49.6%)           | 1348 (47.1%)             | 0.159     |
| Stage of disease at initial diagnosis:                               |                       |                          | 0.071     |
| 0                                                                    | 0 (0.0%)              | 1 (0.04%)                |           |
| I                                                                    | 130 (11.4%)           | 258 (9.5%)               |           |
| II                                                                   | 102 (8.9%)            | 207 (7.7%)               |           |
| III                                                                  | 227 (19.8%)           | 619 (22.9%)              |           |
| IV                                                                   | 686 (59.9%)           | 1618 (59.9%)             |           |
| Histologic subtype:                                                  |                       |                          | <0.001    |
| Non-squamous cell carcinoma                                          | 1070 (88.8%)          | 2083 (72.9%)             |           |
| NSCLC histology NOS                                                  | 56 (4.7%)             | 129 (4.5%)               |           |
| Squamous cell carcinoma                                              | 79 (6.6%)             | 647 (22.6%)              |           |
| No. of lines of therapy received:                                    |                       |                          | 0.077     |
| 1                                                                    | 360 (29.9%)           | 823 (28.8%)              |           |
| 2                                                                    | 242 (20.1%)           | 569 (19.9%)              |           |
| 3+                                                                   | 195 (16.2%)           | 560 (19.6%)              |           |
| No line of therapy captured in database                              | 408 (33.9%)           | 907 (31.7%)              |           |
| Follow-up [days] from initial diagnosis (median, [IQR])              | 32.0 [12.0;68.0]      | 34.0 [12.0;72.0]         | 0.219     |
| Months between advanced diagnosis and FMI test dates (median, [IQR]) | 2.00 [1.00;10.00]     | 2.00 [1.00;12.0]         | 0.001     |

**eTable 2 (Continued)***Cohort Sociodemographic and Tumor Characteristics by BRAF*

|                                                                      | <i>BRAF</i> mutant<br>N=202 | <i>BRAF</i> wild-type<br>N=3862 | p.overall |
|----------------------------------------------------------------------|-----------------------------|---------------------------------|-----------|
| Age at advanced diagnosis (median, [IQR])                            | 66.5 [59.8;72.2]            | 66.0 [58.0;73.0]                | 0.793     |
| Gender:                                                              |                             |                                 | 0.123     |
| Female                                                               | 116 (57.4%)                 | 1993 (51.6%)                    |           |
| Male                                                                 | 86 (42.6%)                  | 1869 (48.4%)                    |           |
| Smoking status:                                                      |                             |                                 | 0.243     |
| History of smoking                                                   | 160 (79.2%)                 | 3023 (78.3%)                    |           |
| No history of smoking                                                | 37 (18.3%)                  | 791 (20.5%)                     |           |
| Unknown/Not documented                                               | 5 (2.5%)                    | 48 (1.2%)                       |           |
| Race:                                                                |                             |                                 | 0.886     |
| Asian                                                                | 4 (2.0%)                    | 122 (3.2%)                      |           |
| Black or African American                                            | 9 (4.5%)                    | 218 (5.6%)                      |           |
| Hispanic or Latino                                                   | 0 (0.0%)                    | 6 (0.2%)                        |           |
| Other Race                                                           | 18 (8.9%)                   | 354 (9.2%)                      |           |
| Unknown/unavailable                                                  | 24 (11.9%)                  | 493 (12.8%)                     |           |
| White                                                                | 147 (72.8%)                 | 2669 (69.1%)                    |           |
| Disease status: Advanced                                             | 164 (81.2%)                 | 3358 (86.9%)                    | 0.025     |
| Vital status: Has documented date of death                           | 96 (47.5%)                  | 1850 (47.9%)                    | 0.974     |
| Stage of disease at initial diagnosis:                               |                             |                                 | 0.816     |
| 0                                                                    | 0 (0.00%)                   | 1 (0.03%)                       |           |
| I                                                                    | 21 (10.9%)                  | 367 (10.0%)                     |           |
| II                                                                   | 12 (6.3%)                   | 297 (8.1%)                      |           |
| III                                                                  | 44 (22.9%)                  | 802 (21.9%)                     |           |
| IV                                                                   | 115 (59.9%)                 | 2189 (59.9%)                    |           |
| Histologic subtype:                                                  |                             |                                 | <0.001    |
| Non-squamous cell carcinoma                                          | 179 (88.6%)                 | 2974 (77.0%)                    |           |
| NSCLC histology NOS                                                  | 8 (4.0%)                    | 177 (4.6%)                      |           |
| Squamous cell carcinoma                                              | 15 (7.4%)                   | 711 (18.4%)                     |           |
| No. of lines of therapy received:                                    |                             |                                 | 0.041     |
| 1                                                                    | 41 (20.3%)                  | 1142 (29.6%)                    |           |
| 2                                                                    | 45 (22.3%)                  | 766 (19.8%)                     |           |
| 3+                                                                   | 40 (19.8%)                  | 715 (18.5%)                     |           |
| No line of therapy captured in database                              | 76 (37.6%)                  | 1239 (32.1%)                    |           |
| Follow-up [days] from initial diagnosis (median, [IQR])              | 32.5 [11.0;73.8]            | 34.0 [12.0;71.0]                | 0.944     |
| Months between advanced diagnosis and FMI test dates (median, [IQR]) | 2.00 [1.00;8.00]            | 2.00 [1.00;11.0]                | 0.664     |



**eTable 2 (Continued)***Cohort Sociodemographic and Tumor Characteristics by MET*

|                                                                      | <i>MET</i> mutant<br>N=191 | <i>MET</i> wild-type<br>N=3873 | p.overall |
|----------------------------------------------------------------------|----------------------------|--------------------------------|-----------|
| Age at advanced diagnosis (median, [IQR])                            | 71.0 [63.0;77.2]           | 66.0 [58.0;73.0]               | <0.001    |
| Gender:                                                              |                            |                                | 0.616     |
| Female                                                               | 103 (53.9%)                | 2006 (51.8%)                   |           |
| Male                                                                 | 88 (46.1%)                 | 1867 (48.2%)                   |           |
| Smoking status:                                                      |                            |                                | 0.029     |
| History of smoking                                                   | 135 (70.7%)                | 3048 (78.7%)                   |           |
| No history of smoking                                                | 53 (27.7%)                 | 775 (20.0%)                    |           |
| Unknown/Not documented                                               | 3 (1.6%)                   | 50 (1.3%)                      |           |
| Race:                                                                |                            |                                | 0.640     |
| Asian                                                                | 8 (4.2%)                   | 118 (3.1%)                     |           |
| Black or African American                                            | 6 (3.1%)                   | 221 (5.7%)                     |           |
| Hispanic or Latino                                                   | 0 (0.0%)                   | 6 (0.2%)                       |           |
| Other Race                                                           | 17 (8.9%)                  | 355 (9.2%)                     |           |
| Unknown/unavailable                                                  | 25 (13.1%)                 | 492 (12.7%)                    |           |
| White                                                                | 135 (70.7%)                | 2681 (69.2%)                   |           |
| Disease status: Advanced                                             | 164 (85.9%)                | 3358 (86.7%)                   | 0.823     |
| Vital status: Has documented date of death                           | 94 (49.2%)                 | 1852 (47.8%)                   | 0.762     |
| Stage of disease at initial diagnosis:                               |                            |                                | 0.080     |
| 0                                                                    | 0 (0.00%)                  | 1 (0.03%)                      |           |
| I                                                                    | 27 (15.1%)                 | 361 (9.8%)                     |           |
| II                                                                   | 8 (4.5%)                   | 301 (8.2%)                     |           |
| III                                                                  | 36 (20.1%)                 | 810 (22.1%)                    |           |
| IV                                                                   | 108 (60.3%)                | 2196 (59.9%)                   |           |
| Histologic subtype:                                                  |                            |                                | 0.009     |
| Non-squamous cell carcinoma                                          | 165 (86.4%)                | 2988 (77.1%)                   |           |
| NSCLC histology NOS                                                  | 7 (3.7%)                   | 178 (4.6%)                     |           |
| Squamous cell carcinoma                                              | 19 (10.0%)                 | 707 (18.3%)                    |           |
| No. of lines of therapy received:                                    |                            |                                | 0.216     |
| 1                                                                    | 55 (28.8%)                 | 1128 (29.1%)                   |           |
| 2                                                                    | 46 (24.1%)                 | 765 (19.8%)                    |           |
| 3+                                                                   | 26 (13.6%)                 | 729 (18.8%)                    |           |
| No line of therapy captured in database                              | 64 (33.5%)                 | 1251 (32.3%)                   |           |
| Follow-up [days] from initial diagnosis (median, [IQR])              | 24.0 [7.00;58.5]           | 34.0 [12.0;71.0]               | 0.002     |
| Months between advanced diagnosis and FMI test dates (median, [IQR]) | 2.00 [1.00;9.00]           | 2.00 [1.00;11.0]               | 0.103     |

**eTable 2 (Continued)***Cohort Sociodemographic and Tumor Characteristics by RET*

|                                                                      | <i>RET</i> mutant<br>N=70 | <i>RET</i> wild-type<br>N=3994 | p.overall |
|----------------------------------------------------------------------|---------------------------|--------------------------------|-----------|
| Age at advanced diagnosis (median, [IQR])                            | 64.0<br>[58.0;70.0]       | 66.0 [58.0;73.0]               | 0.168     |
| Gender:                                                              |                           |                                | 0.212     |
| Female                                                               | 42 (60.0%)                | 2067 (51.8%)                   |           |
| Male                                                                 | 28 (40.0%)                | 1927 (48.2%)                   |           |
| Smoking status:                                                      |                           |                                | <0.001    |
| History of smoking                                                   | 37 (52.9%)                | 3146 (78.8%)                   |           |
| No history of smoking                                                | 32 (45.7%)                | 796 (19.9%)                    |           |
| Unknown/Not documented                                               | 1 (1.4%)                  | 52 (1.30%)                     |           |
| Race:                                                                |                           |                                | 0.493     |
| Asian                                                                | 3 (4.3%)                  | 123 (3.1%)                     |           |
| Black or African American                                            | 6 (8.6%)                  | 221 (5.5%)                     |           |
| Hispanic or Latino                                                   | 0 (0.00%)                 | 6 (0.2%)                       |           |
| Other Race                                                           | 4 (5.7%)                  | 368 (9.2%)                     |           |
| Unknown/unavailable                                                  | 6 (8.6%)                  | 511 (12.8%)                    |           |
| White                                                                | 51 (72.9%)                | 2765 (69.2%)                   |           |
| Disease status: Advanced                                             | 61 (87.1%)                | 3461 (86.7%)                   | 1.000     |
| Vital status: Has documented date of death                           | 29 (41.4%)                | 1917 (48.0%)                   | 0.332     |
| Stage of disease at initial diagnosis:                               |                           |                                | 0.367     |
| 0                                                                    | 0 (0.00%)                 | 1 (0.03%)                      |           |
| I                                                                    | 5 (7.6%)                  | 383 (10.1%)                    |           |
| II                                                                   | 3 (4.6%)                  | 306 (8.1%)                     |           |
| III                                                                  | 20 (30.3%)                | 826 (21.8%)                    |           |
| IV                                                                   | 38 (57.6%)                | 2266 (59.9%)                   |           |
| Histologic subtype:                                                  |                           |                                | 0.254     |
| Non-squamous cell carcinoma                                          | 53 (75.7%)                | 3100 (77.6%)                   |           |
| NSCLC histology NOS                                                  | 6 (8.57%)                 | 179 (4.5%)                     |           |
| Squamous cell carcinoma                                              | 11 (15.7%)                | 715 (17.9%)                    |           |
| No. of lines of therapy received:                                    |                           |                                | 0.676     |
| 1                                                                    | 22 (31.4%)                | 1161 (29.1%)                   |           |
| 2                                                                    | 10 (14.3%)                | 801 (20.1%)                    |           |
| 3+                                                                   | 13 (18.6%)                | 742 (18.6%)                    |           |
| No line of therapy captured in database                              | 25 (35.7%)                | 1290 (32.3%)                   |           |
| Follow-up [days] from initial diagnosis (median, [IQR])              | 41.5<br>[8.75;95.8]       | 34.0 [12.0;71.0]               | 0.377     |
| Months between advanced diagnosis and FMI test dates (median, [IQR]) | 3.00<br>[1.00;21.0]       | 2.00 [1.00;11.0]               | 0.061     |

**eTable 2 (Continued)***Cohort Sociodemographic and Tumor Characteristics by ERBB2*

|                                                                      | <i>ERBB2</i> mutant<br>N=186 | <i>ERBB2</i> wild-type<br>N=3878 | p.overall |
|----------------------------------------------------------------------|------------------------------|----------------------------------|-----------|
| Age at advanced diagnosis (median, [IQR])                            | 67.0 [59.0;73.0]             | 66.0 [58.0;73.0]                 | 0.909     |
| Gender:                                                              |                              |                                  | 0.997     |
| Female                                                               | 96 (51.6%)                   | 2013 (51.9%)                     |           |
| Male                                                                 | 90 (48.4%)                   | 1865 (48.1%)                     |           |
| Smoking status:                                                      |                              |                                  | <0.001    |
| History of smoking                                                   | 107 (57.5%)                  | 3076 (79.3%)                     |           |
| No history of smoking                                                | 76 (40.9%)                   | 752 (19.4%)                      |           |
| Unknown/Not documented                                               | 3 (1.61%)                    | 50 (1.3%)                        |           |
| Race:                                                                |                              |                                  | 0.004     |
| Asian                                                                | 13 (7.0%)                    | 113 (2.9%)                       |           |
| Black or African American                                            | 10 (5.4%)                    | 217 (5.6%)                       |           |
| Hispanic or Latino                                                   | 2 (1.2%)                     | 4 (0.10%)                        |           |
| Other Race                                                           | 20 (10.8%)                   | 352 (9.1%)                       |           |
| Unknown/unavailable                                                  | 26 (14.0%)                   | 491 (12.7%)                      |           |
| White                                                                | 115 (61.8%)                  | 2701 (69.6%)                     |           |
| Disease status: Advanced                                             | 167 (89.8%)                  | 3355 (86.5%)                     | 0.241     |
| Vital status: Has documented date of death                           | 92 (49.5%)                   | 1854 (47.8%)                     | 0.714     |
| Stage of disease at initial diagnosis:                               |                              |                                  | 0.678     |
| 0                                                                    | 0 (0.00%)                    | 1 (0.03%)                        |           |
| I                                                                    | 13 (7.4%)                    | 375 (10.2%)                      |           |
| II                                                                   | 13 (7.4%)                    | 296 (8.1%)                       |           |
| III                                                                  | 39 (22.2%)                   | 807 (22.0%)                      |           |
| IV                                                                   | 111 (63.1%)                  | 2193 (59.7%)                     |           |
| Histologic subtype:                                                  |                              |                                  | 0.052     |
| Non-squamous cell carcinoma                                          | 157 (84.4%)                  | 2996 (77.3%)                     |           |
| NSCLC histology NOS                                                  | 8 (4.3%)                     | 177 (4.6%)                       |           |
| Squamous cell carcinoma                                              | 21 (11.3%)                   | 705 (18.2%)                      |           |
| No. of lines of therapy received:                                    |                              |                                  | 0.145     |
| 1                                                                    | 62 (33.3%)                   | 1121 (28.9%)                     |           |
| 2                                                                    | 31 (16.7%)                   | 780 (20.1%)                      |           |
| 3+                                                                   | 42 (22.6%)                   | 713 (18.4%)                      |           |
| No line of therapy captured in database                              | 51 (27.4%)                   | 1264 (32.6%)                     |           |
| Follow-up [days] from initial diagnosis (median, [IQR])              | 32.0 [14.0;60.5]             | 34.0 [12.0;71.0]                 | 0.579     |
| Months between advanced diagnosis and FMI test dates (median, [IQR]) | 2.00 [1.00;11.0]             | 2.00 [1.00;11.0]                 | 0.521     |

**eTable 3.** Real-World Maximal Response to Therapy (rwMTR) for Patients Treated With an EGFR Inhibitor Stratified by the Presence of a Mutation

**Interpretation:** A p-value of < 0.05 suggests an association between mutation status and response to the corresponding targeted agent, as defined by the sum of stable disease, partial response, and complete response.

|                                     | EGFR Inhibitor Therapy        |                           |  |
|-------------------------------------|-------------------------------|---------------------------|--|
|                                     | <i>EGFR</i> Mutant<br>(n=330) | <i>EGFR</i> WT<br>(n=116) |  |
| Progressive Disease                 | 46                            | 59                        |  |
| Stable Disease                      | 68                            | 39                        |  |
| Partial Response                    | 195                           | 16                        |  |
| Complete Response                   | 21                            | 2                         |  |
|                                     |                               |                           |  |
| Progressive Disease                 | 46                            | 57                        |  |
| Clinical Benefit Rate<br>(SD+PR+CR) | 284                           | 59                        |  |
| p-value for association             | p < 0.01                      |                           |  |

**eTable 4.** Cox Multivariable Analysis for Risk of Discontinuing CIT

| Variable                    | HR   | Lower 0.95 | Upper 0.95 | P-value |
|-----------------------------|------|------------|------------|---------|
| Line CIT administered*      | 1.19 | 1.04       | 1.36       | 0.010   |
| TMB (per 10 mut/Mb)         | 0.78 | 0.65       | 0.95       | 0.011   |
| Male                        | 1.32 | 0.98       | 1.78       | 0.072   |
| PD-L1 Positive              | 0.82 | 0.60       | 1.12       | 0.206   |
| Never smoker                | 1.27 | 0.84       | 1.92       | 0.256   |
| NOS histology†              | 1.23 | 0.86       | 1.76       | 0.258   |
| Age at Advanced Diagnosis** | 1.01 | 0.99       | 1.02       | 0.427   |
| Black Race‡                 | 1.13 | 0.38       | 3.36       | 0.825   |
| Squamous histology†         | 1.04 | 0.68       | 1.60       | 0.845   |
| <i>EGFR</i> WT              | 0.95 | 0.55       | 1.64       | 0.859   |
| <i>KRAS</i> WT              | 1.02 | 0.72       | 1.45       | 0.909   |
| <i>ALK</i> WT               | 1.13 | 0.12       | 10.96      | 0.917   |
| Non-Asian/Black/White Race‡ | 1.04 | 0.37       | 2.97       | 0.935   |
| White Race‡                 | 1.02 | 0.40       | 2.60       | 0.973   |

**Notes:**

\* Line CIT Administered refers to each additional line after the first line of therapy that CIT was first administered. For example, initial CIT administration in the third line would confer a HR of 1.42 (1.19 x 1.19) of discontinuing therapy compared to first line.

\*\* For every additional year of age

† Histology HR is relative to adenocarcinoma histology

‡ Race HR is relative to Asian race
